1 **Neoteny in visual system development of the spotted unicornfish, *Naso brevirostris***  
2 **(Acanthuridae)**

3

4 Valerio Tettamanti<sup>1,2</sup>, Fanny de Busserolles<sup>1</sup>, David Lecchini<sup>3,4</sup>, Justin Marshall<sup>1</sup>, Fabio  
5 Cortesi<sup>1</sup>

6

7 <sup>1</sup> Queensland Brain Institute, The University of Queensland, 4072 Brisbane, Australia

8 <sup>2</sup> Swiss Federal Institute of Technology Zurich, 8092 Zurich, Switzerland

9 <sup>3</sup> PSL Research University: EPHE-UPVD-CNRS, USR3278 CRIOBE, BP 1013, 98729

10 Papetoai, Moorea, French Polynesia

11 <sup>4</sup> Laboratoire d'Excellence "CORAIL", Paris, France

12

13 Corresponding author: F. Cortesi, E-mail: [fabio.cortesi@uqconnect.edu.au](mailto:fabio.cortesi@uqconnect.edu.au)

14

15 **Abstract**

16 Ontogenetic changes of the visual system are often correlated to shifts in habitat and feeding  
17 behaviour of animals. Coral reef fishes begin their lives in the pelagic zone and then migrate  
18 to the reef. This transition of habitat frequently involves a change in diet and light  
19 environment as well as major morphological modifications. The spotted unicornfish, *Naso*  
20 *brevirostris*, is known to shift diet from zooplankton to algae and back to zooplankton when  
21 transitioning from larval to juvenile and then to adult stages. Concurrently, *N. brevirostris*  
22 also moves from an open pelagic to a coral-associated habitat before migrating up in the  
23 water column when reaching adulthood. Using retinal mapping techniques, we discovered  
24 that the distribution and density of ganglion and photoreceptor cells in *N. brevirostris* do not  
25 change with the habitat or the feeding habits of each developmental stage. Instead, fishes  
26 showed a neotenic development with a slight change from larval to juvenile stages and not  
27 many modifications thereafter. Visual gene expression based on RNA sequencing mirrored  
28 this pattern; independent of stage, fishes mainly expressed three cone opsin genes (*SWS2B*,  
29 *RH2B*, *RH2A*), with a quantitative difference in the expression of the green opsin genes  
30 (*RH2A* and *RH2B*) when transitioning from larvae to juveniles. Hence, contrary to the  
31 ontogenetic changes found in many animals, the visual system is fixed early on in *N.*  
32 *brevirostris* development calling for a thorough analysis of visual system development of the  
33 reef fish community.

## 34 **Introduction**

35 Many animals use vision to perform important behavioural tasks such as feeding, mating,  
36 avoiding predators and to find a suitable home (Cronin *et al.* 2014). At the core of the  
37 vertebrate visual system is the retina, an extrusion of the brain which is subdivided into  
38 various functional layers, two of which are at the centre of this study, the photoreceptor layer  
39 and the ganglion cell layer.

40 The photoreceptor layer is the first stage of visual processing and is composed of  
41 morphologically diverse cone and rod photoreceptor cells which absorb light, transform it  
42 into an electrical signal, and send the information downstream to various neural cells via the  
43 phototransduction cascade. Cones mediate vision in bright light conditions and colour vision  
44 while rods mediate vision in dim light conditions (Walls 1942). Cones can further be  
45 classified into different types depending on their morphology and/or the type of  
46 photopigment (an opsin protein covalently bound to a light absorbing chromophore) they  
47 possess (Hunt *et al.* 2014). Morphologically, cones can be classified as single, double, triple  
48 or quadruple, although only the first two configurations are common and are often arranged  
49 in regular and specific patterns or mosaics (Peichl *et al.* 2004; Bowmaker and Kunz 1987).  
50 Molecularly, cones are also classified into four types based on the opsin genes they express  
51 that encode for different protein classes sensitive to different parts of the visible light  
52 spectrum. The short-wavelength protein class 1 opsin (SWS1) maximally sensitive to UV-  
53 violet wavelengths (355-450 nm  $\lambda_{\max}$ ), and a second short-wavelength class opsin (SWS2)  
54 maximally sensitive to the violet-blue part of the spectrum (410-490 nm  $\lambda_{\max}$ ), are expressed  
55 in single cones. Double cones express middle-wavelength class 2 opsin (RH2) maximally  
56 sensitive to blue-green wavelengths (470-535 nm  $\lambda_{\max}$ ), and a long-wavelength class opsin  
57 (LWS) maximally sensitive to the green-red part of the light spectrum (490-570 nm  $\lambda_{\max}$ ).  
58 Most vertebrates possess a single type of rod photoreceptor expressing the rod opsin protein  
59 (RH1; 460-530 nm  $\lambda_{\max}$ ) (Bowmaker 2008; Walls 1934).

60 The ganglion cell layer is the last stage of visual processing in the retina and is  
61 composed of ganglion cells that possess axons that reach to the inner surface of the retina and  
62 converge into the optic nerve to send the information into the central nervous system (Walls  
63 1942). Therefore, the arrangement and the spacing between one ganglion cell to another is  
64 one of the determining factors of visual acuity (or resolution) (Fernald 1988).

65 In order to perform at its optimum, the visual system of a particular species is adapted  
66 to the type of habitat they live in and to the prevailing surrounding light conditions (Lythgoe  
67 1979). In general, vertebrates range from cone-monochromats with a single spectral class of

68 cone photoreceptor (e.g., sharks and many rays), over di- and trichromats (e.g., most  
69 mammals and many marine fishes), to tetrachromats (e.g., most birds and many freshwater  
70 fishes; Bowmaker 2008). Cone photoreceptors and their respective opsin repertoires are  
71 particularly diverse in teleost fishes (e.g., Musilova *et al.* 2019; Lin *et al.* 2017). This is  
72 thought to primarily be due to the different light environments fishes inhabit (Lythgoe 1979;  
73 Cronin *et al.* 2014), but in some instances may also be driven by sexual selection (Endler  
74 1990) and/or the feeding habits of species. For example, UV photoreception increases  
75 feeding efficiency in some fishes eating UV-absorbing or scattering zooplankton (Loew *et al.*  
76 1993; Novalés-Flamarique and Hawryshyn 1994; Flamarique 2016), while herbivorous fishes  
77 may profit from visual systems tuned to longer wavelengths due to the red-reflecting  
78 properties of chlorophyll (Marshall *et al.* 2003; Stieb *et al.* 2017; Cortesi *et al.* 2018).

79 Further to the type, the density of photoreceptors and ganglion cells can also vary not  
80 only between species, but also within an individual's retina (Shand *et al.* 1999; Shand *et al.*  
81 2000). The study of their distribution using the wholemount technique (Stone and Johnston  
82 1981; Ullmann *et al.* 2012; Coimbra *et al.* 2006) provides useful information on the visual  
83 ecology of a species, which usually reflects its habitat and behavioural ecology (Hughes *et al.*  
84 1977; Bozzano and Collin 2000; Collin and Pettigrew 1988b, 1988a; Collin and Pettigrew  
85 1989). Two main specializations can be found in vertebrates: area and streaks, (Collin and  
86 Pettigrew 1988b, 1988a). Both specializations have higher densities of cells compared to the  
87 rest of the retina, resulting in regions of acute vision in the corresponding field of view. An  
88 area is a concentric increase in cell density in a particular region of the retina, in some  
89 vertebrates it is termed a fovea due to other structural adaptations (Walls, 1942). In teleost  
90 fishes, areas are often located temporally (i.e. area temporalis) and found in species that live  
91 in enclosed environments such as caves or coral structures, and/or coral overhangs (Collin  
92 and Shand 2003; Collin and Pettigrew 1989). The temporal area receives the visual  
93 information from the frontal field of view, corresponding to the natural swimming direction  
94 of fishes. Nevertheless, multiple area centralis can also be found in a single retina (Collin and  
95 Pettigrew 1989). For example, Triggerfishes (Balistidae) possess an area in both the nasal and  
96 temporal part of the retina, which correlates with two main visual tasks: feeding (temporal)  
97 and predator avoidance (nasal) (Ito and Murakami 1984; Collin and Pettigrew 1988b).

98 A horizontal streak is defined by an increase in cell density along the meridian. Most  
99 horizontal streaks are found in the central meridian, but sometimes they can also be located  
100 more ventrally or dorsally (Collin and Shand 2003). The streak maintains a high spatial  
101 resolving power throughout the horizontal section of the retina and is thought to be used to

102 scan the horizon. It leads to an elongated sampling of the visual environment without  
103 continuous eye movements (Collin and Shand 2003). Teleost fishes possessing a horizontal  
104 streak are commonly found in open water environments such as sandy bottoms or pelagic  
105 open ocean environments (Collin and Pettigrew 1988b).

106 Variability in retinal structure and opsin gene repertoire does not only exist between  
107 species but both visual features may also change throughout the life of an individual. This is  
108 especially true for species that undergo substantial habitat changes during ontogeny such as  
109 coral reef fishes. The life of most coral reef fishes starts in the shallower zone of the open  
110 ocean as larvae (Helfman *et al.* 2009; Job and Bellwood 2000), where resources may be high  
111 and the risk of predation is low (Fortier and Harris 1989). At this stage, pelagic fish larvae  
112 feed typically on zooplankton (Boehlert 1996) and rely on vision primarily for fundamental  
113 tasks such as predator avoidance and feeding (Leis and Carson-Ewart 1999). After their  
114 oceanic phase, reef fish larvae typically find a suitable coral reef patch to settle on and again  
115 vision is one of the main senses used (Lecchini *et al.* 2005a; Lecchini *et al.* 2005b). During  
116 this settlement phase, reef fish larvae undergo metamorphosis and reach the juvenile stage in  
117 which they usually already possess all basic morphological features of the adult form (Holzer  
118 *et al.* 2017). Following settlement on the reef, juvenile fishes are challenged with visual cues  
119 that are much more complex than in the open ocean varying both in chromaticity and  
120 luminance. Hence, at this stage (or slightly before – Cortesi *et al.* 2016) the visual system of  
121 coral reef fishes is expected to undergo changes both in morphology and physiology  
122 (Helfman *et al.* 2009).

123 To date, changes in arrangement (i.e. mosaic) and distribution of the photoreceptor  
124 cells throughout ontogeny have been documented only in few coral reef fishes (Shand 1997).  
125 These changes are thought to enhance survivability by increasing feeding success and  
126 facilitate predator avoidance in reef stages (juveniles and adults; Shand 1997). Along with  
127 changes in morphology, ontogenetic changes in opsin gene expression have also been  
128 reported from a handful of species (Cortesi *et al.* 2016; Cortesi *et al.* 2015b). For example, in  
129 the dottyback *Pseudochromis fuscus*, the number and type of opsin genes that are expressed  
130 differs between larval, juvenile, and adult stages. Along with the change in opsin gene  
131 expression, the visual system may also transform to more complex colour processing  
132 capability, such as di- to tri-chromacy or even up to tetrachromacy. This increase in  
133 chromaticity ultimately requires behavioural testing to confirm and is likely to reflect major  
134 habitat transitions throughout development equipping e.g., dottybacks with a more complex  
135 visual system as they grow and mature (Cortesi *et al.* 2016; Cortesi *et al.* 2015b). In

136 comparison, while some freshwater cichlid species show a similarly dynamic change in opsin  
137 gene expression through ontogeny, other species do not change gene expression much  
138 (neoteny) or then, they directly develop from the larval to the adult gene-expression pattern  
139 (Carleton *et al.* 2008; Härer *et al.* 2017). We currently do not know whether a progressive  
140 developmental change of the visual system, as e.g., found in the dottyback (Cortesi *et al.*  
141 2016), is a common feature shared among reef fishes, or whether some species also show  
142 different developmental modes, similar to what is found in cichlid fishes.

143 In this study we investigated ontogenetic changes in retinal topography and opsin  
144 gene expression in three life stages (larval, juvenile, adult) of the spotted unicornfish, *Naso*  
145 *brevirostris*, from the surgeonfish family (Acanthuridae) (Fig. 1). *N. brevirostris* is known to  
146 shift both diet and habitat during ontogeny (Choat *et al.* 2002; K. Clements, D. Bellwood  
147 personal communication). Pelagic larvae feed on zooplankton before settling on the reef  
148 where they mainly feed on algae as juveniles. As adults, *N. brevirostris* migrate to the reef  
149 slope returning to a zooplanktivorous diet (Choat *et al.* 2002; Choat *et al.* 2004). We  
150 therefore hypothesized that the visual system of *N. brevirostris* would show a ‘classic’  
151 developmental mode, linked to either changes in habitat or diet, or both, and with a  
152 progression from larval, to juvenile and finally adult traits. Moreover, *N. brevirostris*  
153 develops an elongated rostral snout during maturation, and this prominent morphological  
154 change may also affect its visual requirements as it might obstruct the visual field of the fish.

155

## 156 **Materials and Methods**

### 157 *Study species and collection*

158 Individuals of *N. brevirostris* were collected on the Northern Great Barrier Reef, Australia,  
159 under the Great Barrier Reef Marine Park Association (GBRMPA) permits G17/38160.1 and  
160 G16/38497.1, Queensland Fisheries permit #180731, or in French Polynesia. Adults (n = 6)  
161 were collected with a spear gun from No Name Reef (14°65 'S, 145°65'E) on the outer Great  
162 Barrier Reef, Australia, in February 2018. Juveniles (n = 8) were collected using barrier nets,  
163 spear guns or clove oil and hand nets from reefs surrounding Lizard Island (14°40'S,  
164 145°27'E) on the Great Barrier Reef between February 2016 – February 2018. Two  
165 additional juvenile samples were acquired through the aquarium supplier Cairns Marine  
166 (<http://www.cairnsmarine.com/>). Larval fish (n = 5) were captured using a crest net on  
167 Tetiaroa Island, French Polynesia (16°99'S, 149°58'W) in March 2018 (Lecchini *et al.* 2004,  
168 Besson *et al.* 2017). All animals were quickly anaesthetised following the NHMRC

169 Australian Code of Practice under an animal ethics protocol of The Queensland Brain  
170 Institute (QBI/236/13/ARC/US AIRFORCE and QBI/304/16).

171 Each individual was photographed with a ruler in the frame, to be able to extract the  
172 standard length later on using Fiji v.1.0 (Schindelin *et al.* 2012). The eyes were enucleated  
173 and the cornea and lens removed using micro-dissection scissors. A small dorsal cut was  
174 made to keep track of the eye's orientation. The samples collected for retinal mapping were  
175 fixed in 4% paraformaldehyde in 0.1 M phosphate buffer (PBS; pH 7.4) and stored at 4  
176 degrees Celsius and the eyes used for RNA sequencing were kept in RNAlater (Sigma) and  
177 stored at -20 degrees Celsius. For each eye, the lens diameter was measured after dissection  
178 and fixation.

179

### 180 *Preparation of retinal wholemounts*

181 Retinal wholemounts were prepared according to standard protocols (Stone and Johnston  
182 1981; Coimbra *et al.* 2006; Coimbra *et al.* 2012). Briefly, each eye cup was cut radially  
183 multiple times, to flatten it on a microscopy glass slide without damaging the tissue. The  
184 retina was oriented using the falciform process that extends ventrally. The sclera and choroid  
185 were gently removed and the retinas were bleached overnight in the dark at ambient  
186 temperature in a 3% hydrogen peroxide solution (in PBS). Large-sized adult retinas, that have  
187 a more developed retinal pigment epithelium, were bleached in the same solution but with a  
188 few drops of potassium hydroxide (Ullmann *et al.* 2012). While potassium hydroxide  
189 accelerates the bleaching process by increasing the pH of the solution, this type of bleaching  
190 is quite aggressive for the tissue. Therefore, these retinas were only bleached for 2-3h in the  
191 dark.

192 For ganglion cell analyses, retinas were mounted ganglion cell layer facing up on a  
193 gelatinized slide and left to dry overnight at room temperature in formalin vapours (Coimbra  
194 *et al.* 2006; Coimbra *et al.* 2012). Wholemounts were then stained in 0.1% cresyl violet  
195 (Nissl staining) following the protocol of Coimbra *et al.* (2006) and then mounted with  
196 Entellan New (Merck). Shrinkage of the retina using this technique is usually dimmed  
197 negligible and, if present, restricted to the borders of the retina (Coimbra *et al.* 2006). In this  
198 study however, all the retinas were not equal in shrinkage due to major differences in retina  
199 size between developmental stages. As such, the smaller retinas (larval stage) were more  
200 affected by shrinkage, due to their smaller surface (i.e. higher proportion of retinal borders),  
201 than the other stages (adult and juvenile stages). Shrinkage in these retinas was easily  
202 identified under the microscope and was taken into consideration in the data interpretation.

203 For photoreceptor analyses, retinas were wholemounted in 100% glycerol, on non-  
204 gelatinized slides with the inner (vitreal) surface facing downwards. Contrary to ganglion cell  
205 mounting, photoreceptor mounting shows negligible shrinkage as it takes place in an aqueous  
206 medium (Peichl *et al.* 2004).

207

### 208 *Stereological analyses and construction of topographic maps*

209 The topographic distribution and the total number of ganglion cells, single cones, double  
210 cones and total cones in the three life stages of *N. brevirostris* were assessed using the optical  
211 fractionator technique (West *et al.* 1991), modified for wholemount retina use, by Coimbra *et al.*  
212 2009, 2012. A computer running the Stereo Investigator software (v2017.01.1 (64-bit),  
213 Microbrightfield, USA) coupled to a compound microscope (Zeiss Imager.Z2) equipped with  
214 a motorized stage (MAC 6000 System, Microbrightfield, USA) and a digital colour camera  
215 (Microbrightfield) was used for the analysis. The contour of each retina wholemount was  
216 digitalized using a x5 objective (numerical aperture 0.16) and cells were counted randomly  
217 and systematically using a x63 oil immersion objective (numerical aperture 1.40) and the  
218 parameters summarised in Tables S1 and S2. The total number of cells for each sample was  
219 then estimated by multiplying the sum of the neurons (ganglion cells or photoreceptors)  
220 counted by the area of sampling fraction (Coimbra *et al.* 2009; West *et al.* 1991).

221 The counting frame and grid size were chosen carefully in order to achieve an  
222 acceptable Shaeffer's coefficient of error (CE), while maintaining the highest level of  
223 sampling. The CE measures the accuracy of the estimation of the total cell number and it is  
224 deemed acceptable below 0.1 (Glaser and Wilson 1998; Slomianka and West 2005). The  
225 counting frame was adjusted between life stages to reach an average count of around 40 and  
226 80 cells per sampling site for ganglion cells and photoreceptors respectively, but was kept  
227 identical for individuals of the same life stage (Tables S1 and S2, S1). Since fish of similar  
228 life stages can have a wide variation of standard lengths, the grid size was adjusted for all  
229 individuals to allow sampling of around 200 sites ( $\pm 10\%$ ) (de Busserolles *et al.* 2014a; de  
230 Busserolles *et al.* 2014b).

231 Three cell types can be found in the ganglion cell layer: ganglion cells, displaced  
232 amacrine cells and glial cells. These can usually be distinguished based on cytological criteria  
233 (Collin 1988; Collin and Pettigrew 1988c; Hughes 1975) with ganglion cells having an  
234 irregular shape, an extensive nucleus, and a larger size compared to smaller, rounder  
235 amacrine cells, which have a darker stained appearance, and glial cells having an elongated  
236 shape relative to the other two cell types (Fig. 2A). However, since amacrine cells were often

237 difficult to distinguish from ganglion cells in *N. brevirostris*, especially in high density areas,  
238 amacrine cells were included in all counts and only glial cells were excluded. The inclusion  
239 of amacrine cells in the analysis should not interfere with the overall topography, since the  
240 distribution of amacrine cells has been shown to match the ganglion cell distributions in other  
241 animals (Coimbra *et al.* 2006; Collin 2008; Collin and Pettigrew 1988c; L. and A. 1987;  
242 Bailes *et al.* 2006), and the density of displaced amacrine cells in *N. brevirostris* was  
243 relatively low. However, the inclusion of amacrine cells in the ganglion cells counts will  
244 contribute to a slight overestimation of ganglion cells densities and ultimately to a slight  
245 overestimation of spatial resolving power. For ganglion cell analysis, a sub-sampling was  
246 performed in the regions of highest cell density to allow a more accurate estimation of the  
247 peak ganglion cell density. The same counting frame parameters as for the whole retina were  
248 used for the sub-sampling, but the grid size was reduced by half.

249 Photoreceptor cells, on the other hand, could be distinguished unambiguously into  
250 single and double cones (Fig. 2B). Both cone types were counted separately and  
251 simultaneously using two different markers to acquire data for single cones alone, double  
252 cones alone and total cones (single and double cones).

253 Topographic maps were created using the statistical program R v.3.4.1 (R Foundation  
254 for Statistical Computing, 2012) with the results exported from Stereo Investigator and the R  
255 script provided by Garza-Gisholt *et al.* (2014). As for previous retinal topography studies on  
256 teleost fishes (de Busserolles *et al.* 2014b; de Busserolles *et al.* 2014a; Dalton *et al.* 2016),  
257 the Gaussian Kernel Smoother from the Spatstat package (Baddeley and Turner 2005) was  
258 chosen and the sigma value was adjusted to the distance between points (i.e. grid size) for  
259 each map (Fig. 3).

260

### 261 *Spatial resolving power estimation*

262 The upper limit of the spatial resolving power (SRP) in cycles per degree was estimated for  
263 each individual using the ganglion cell peak density as described by Collin and Pettigrew  
264 (1989). The following formula was used:

$$265 \quad \alpha = \arctan (1/f)$$

266 where  $\alpha$  is the angle subtending 1 mm on the retina and calculated assuming that  $f$ , the focal  
267 length of the fish, is 2.55, the standard for teleost fishes according to the Matthiessen ratio  
268 (Matthiessen 1882). Then, knowing  $\alpha$ , the peak density of ganglion cells (PDG in cells/mm)



269 and the fact that two ganglion cells are needed to distinguish a visual element from its  
270 neighbouring element, the SRP in cycles per degree can be calculated as follow:

$$271 \quad \text{SRP} = (\text{PDG}/\alpha)/2$$

272

### 273 *Transcriptome sequencing, quality filtering, and de-novo assembly*

274 The retinas from different life stages of *N. brevirostris* (adult, n = 3; juvenile, n = 6; larvae, n  
275 = 3) were dissected out of the eye cup, total RNA was extracted, and their retinal  
276 transcriptomes were sequenced according to Musilova *et al.* (2019). Briefly, total RNA of  
277 larval and smaller juvenile retinas was extracted using the RNeasy Mini Kit (Qiagen), and for  
278 larger juvenile and adult retinas the RNeasy Midi Kit (Qiagen) according to the  
279 manufacturer's instructions, which included a DNase treatment. Total RNA concentration  
280 and quality were determined using an Eukaryotic Total RNA NanoChip on an Agilent 2100  
281 BioAnalyzer (Agilent Technologies). Juvenile transcriptomes were sequenced in-house at the  
282 Queensland Brain Institute's sequencing facility. For these samples, strand-specific libraries  
283 were barcoded and pooled at equimolar ratios and sequenced at PE125 on a HiSeq 2000  
284 using Illumina's SBS chemistry version 4. Library preparation (strand-specific, 300 bp insert)  
285 and transcriptome sequencing (RNAseq HiSeq PE150) for larval and adult individuals was  
286 outsourced to Novogene (<https://en.novogene.com/>).

287 Retinal transcriptomes were filtered, and *de novo* assembled following the protocol  
288 described in (de Busserolles *et al.* 2017). Briefly, raw-reads of transcriptomes were uploaded  
289 to the Genomics Virtual Laboratory (GVL 4.0.0) (Afgan *et al.* 2015) on the Galaxy Australia  
290 server (<https://galaxy-qlg.genome.edu.au/galaxy/>), filtered by quality using Trimmomatic  
291 (Galaxy Version 0.36.4) (Bolger *et al.* 2014) and then *de novo* assembled using Trinity  
292 (Galaxy Version 2.4.0.0) (Haas *et al.* 2013).

293

### 294 *Opsin gene mining and phylogenetic reconstruction*

295 Following the protocol in de Busserolles *et al.* (2017), the *N. brevirostris* transcriptomes were  
296 mined for their visual opsin genes. Briefly, using the opsin coding sequences from the dusky  
297 dotyback, *Pseudochromis fuscus* (Cortesi *et al.* 2016), we searched for the *N. brevirostris*  
298 opsin genes by mapping the de-novo assembled transcripts to the *P. fuscus* reference genes  
299 using Geneious v.11.1.3 ([www.geneious.com](http://www.geneious.com)). *P. fuscus* was chosen because it is relatively  
300 closely related to *N. brevirostris* and because it possesses orthologs from all of the ancestral  
301 vertebrate opsin genes (Cortesi *et al.* 2016).

302 Assemblies based on short-read libraries tend to overlook lowly expressed and similar  
303 gene copies and/or short-reads may be misassembled (chimeric sequences); for that reason, a  
304 second approach was used to confirm the visual opsin genes of *N. brevirostris*. A manual  
305 extraction of the gene copies was performed by mapping raw-reads against the *P. fuscus*  
306 references and then moving from single nucleotide polymorphism (SNP) to SNP along the  
307 gene taking advantage of paired-end information to bridge gaps between SNPs. The extracted  
308 reads were then de-novo assembled and their consensus was used as template against which  
309 unassembled reads were re-mapped to elongate the region of interest; this approach  
310 eventually lead to a reconstruction of the whole coding region (for details on this approach  
311 see de Busserolles *et al.* (2017); Musilova *et al.* (2019)).

312 Opsin gene identity was then confirmed using BLAST (<http://blast.ncbi.nlm.nih.gov/>)  
313 and by phylogenetic reconstruction to a reference dataset obtained from Genbank  
314 ([www.ncbi.nlm.nih.gov/genbank/](http://www.ncbi.nlm.nih.gov/genbank/)) and Ensembl ([www.ensembl.org/](http://www.ensembl.org/)) (as per de Busserolles  
315 *et al.* (2017)) (Fig. 3). The opsin gene phylogeny was obtained by first aligning all opsin  
316 genes i.e. the reference dataset and *N. brevirostris* genes using the L-INS-I settings as part of  
317 the Geneious MAFFT plugin v.1.3.7 (Kato and Standley 2013). jModeltest v.2.1.10  
318 (Darriba *et al.* 2012) was subsequently used to select the most appropriate model of sequence  
319 evolution based on the Akaike information criterion. MrBayes v.3.2.6 (Ronquist *et al.* 2012)  
320 as part of the CIPRES platform (Miller *et al.* 2010) was then used to infer the phylogenetic  
321 relationship between opsin genes using the following parameter settings: GTR+I+G model;  
322 two independent MCMC searches with four chains each; 10 million generations per run;  
323 1000 generations sample frequency; and, 25% burn-in.

324 Opsin gene mining and phylogenetic reconstruction revealed, amongst a number of  
325 other visual opsin genes, two *N. brevirostris* *RH2* paralogs of which one clustered within the  
326 *RH2A* clade of other percomorph fishes. However, the phylogenetic placement of the second  
327 paralog could not fully be resolved using this approach alone (Fig. 4). Therefore, in order to  
328 resolve a more detailed relationship between the two *N. brevirostris* *RH2* paralogs, we took  
329 advantage of the phylogenetic signal within the single exons of the displaced paralog (as per  
330 Cortesi *et al.* 2015b; Fig. 5). The five *N. brevirostris* *RH2-2(B)* exons were obtained by  
331 annotating the coding regions of the gene with a *P. fuscus* *RH2* ortholog. The single exons  
332 were separated from one another and inserted as “single genes” in the alignment in a reduced  
333 (*RH2* genes only) reference dataset, along with the *N. brevirostris* *RH2A* gene. The *RH2*  
334 specific phylogeny was then reconstructed using MrBayes on the CIPRES platform using the  
335 same parameters as before.

336

### 337 *Opsin gene expression*

338 Quantitative opsin gene expression was assessed by mapping the reads to the  
339 assembled coding regions of the *N. brevis* opsin genes as per de Busserolles *et al.*  
340 (2017). This methodology was used for each individual of the three life stages. Proportional  
341 opsin expression for single cones ( $p_i$ ; SC) and double cones ( $p_i$ ; DC) for each gene ( $i$ ) was  
342 then calculated by first normalizing the number of reads of each gene ( $R_i$ ) to the length of  
343 each gene specific coding region (cds):

$$344 \quad NR_i = (R_i / bp_i)$$

345

346 where,  $R$  is the number of reads and  $bp_i$  the number of base pairs in the cds of a gene  $i$  which  
347 was used to normalize the data between the opsins. The proportion of opsin expressed, out of  
348 the total normalized expression for single ( $Tot_{SC}$ ) and double cones ( $Tot_{DC}$ ), was then  
349 calculated separately. The following formulas were used, depending of which type of cone  
350 the gene  $i$  was expressed in:

$$351 \quad p_i ; SC = NR_i / (Tot_{SC}). \quad \text{or} \quad p_i ; DC = NR_i / (Tot_{DC})$$

352

353 We also calculated the proportional expression of the rod opsin compared to total  
354 normalized opsin expression ( $Tot_{Opsin}$ ):

$$355 \quad p_i ; Rod = NR_i / (Tot_{Opsin})$$

356

## 357 **Results**

### 358 *Topographic distribution of ganglion cells and spatial resolving power*

359 Topographic maps of ganglion cells (including amacrine cells) for the three life stages of *N.*  
360 *brevirostris* were constructed from Nissl-stained retinal wholemounts. Little variation in  
361 topographic distribution of ganglion cells was observed within the same ontogenetic stage.  
362 Therefore, only the topographic map of one individual per life stage is presented here (Fig.  
363 3A), and the results for the remaining individuals are shown in Supplementary Fig. S1.

364 Differences in retinal topography were mainly found between the larval stage and the  
365 two later stages (Fig. 3A). In general, the larval retina showed less specializations compared  
366 to juvenile and adult retinas. In the larval retina, an onset of a horizontal streak was observed  
367 with the highest cell density found in the central meridian of the retina (1.5x increase  
368 compared to the areas with the lowest cell densities). Within this weak streak, three areas of  
369 high cell densities were found; in the nasal, central and temporal parts of the retina. However,

370 these areas of high cell densities are to be taken with caution due to the limitations of the  
371 Nissl-staining protocol for very small retinas. Larval retinas were challenging to prepare and  
372 analyse due to their small size and thus, the higher amount of shrinkage present after staining.  
373 After several attempts with different larvae, only one larval retina was deemed acceptable for  
374 analysis. Even for this individual, the areas of high cell densities in the nasal and temporal  
375 part of the retina are questionable, since they are very close to the retinal borders and  
376 therefore could be the result of shrinkage. A prominent horizontal streak along with a  
377 centralized area centralis (the area centralis had a 2.5-3x increase in cell density compared to  
378 the areas with the lowest cell densities) was present in the juvenile and adult individuals.  
379 Similarly to the larvae, the streak in juveniles and adults was located on the central meridian  
380 of the retina extending to the nasal and temporal margins. Although slightly different patterns  
381 were found for each life stage, they all showed a higher ganglion cell density in the central  
382 area close to the optic nerve, accompanied by a horizontal streak (Fig. 3A).

383 The total number of ganglion cells increased with the size of fish and ranged from  
384 208,975 cells for the larval individual, over ~1,600,000 cells for juveniles, to ~2,100,000  
385 cells for adults (Table 1). Conversely, the mean cell density decreased with the size of the  
386 fish ranging from 19,439 cells/mm<sup>2</sup> in the larval individual, over ~8,500 cells/mm<sup>2</sup> in  
387 juveniles, to ~5,000 in cells/mm<sup>2</sup> in adults. Peak cell density also decreased through  
388 development, from 30,400 cells/mm<sup>2</sup> in the larval individual, to ~23,000 cells/mm<sup>2</sup> in  
389 juveniles, and ~ 20,500 cells/mm<sup>2</sup> in adults.

390 Based on the peak of ganglion cells densities, the SRP of *N. brevirostris* ranged from  
391 2.98 cycles per degree in the larval individual, over ~8.0 cycles per degree in juveniles, to a  
392 maximum of 11.0 cycles per degree in adults (Table 1). Overall, SRP or visual acuity in *N.*  
393 *brevirostris* increased with the size of the fish with very little variation found within  
394 ontogenetic stages (Fig. S2).

395

### 396 *Topographic distribution of cone photoreceptors*

397 The density and topographic distribution of cone photoreceptors (double and single cones),  
398 was assessed in the three life stages of *N. brevirostris*. Double and single cones were  
399 arranged in a square mosaic, with one single cone at the centre of four double cones (Fig.  
400 2B). This pattern was consistent throughout the entire retina, thus providing a ratio of double  
401 cones to single cones of 2:1. As a consequence of this regular arrangement, the topographic  
402 distribution of single cones, double cones and total cones was identical. Moreover, similar to  
403 the ganglion cell topography, little variation in topographic distribution of cone

404 photoreceptors was observed within the same ontogenetic stage. Therefore, only the total  
405 cone topographic map of one individual per life stages is presented here (Fig. 3B). The  
406 remaining maps (i.e., for single and double cones separately, and maps of all individuals) are  
407 provided in the Supplementary Figs. S3 – S5.

408 The topographic distribution of cone photoreceptors varied between stages with a  
409 pronounced increase in specialization from the larval to the juvenile stage and smaller  
410 changes thereafter (Fig. 3B). Larvae had a weak horizontal streak in the central meridian as  
411 well as two area centralis, one in the nasal part and one in the temporal part of the retina. One  
412 of the two analysed larval individuals also showed a dorsal increase in cell density (Fig. S3f).  
413 However, this apparent increase in cell density was likely caused by an artefact from not  
414 properly flattening the dorsal part of the retina during mounting and should therefore be  
415 disregarded (Figs. S3 – S5). Compared to the larvae, juveniles had a more pronounced  
416 horizontal streak in the central meridian. The two area centralis were still present but the  
417 nasal one was less pronounced, and the peak cell density was found in the temporal area  
418 centralis. Moreover, a weak vertical streak could be seen in the temporal part of the retina,  
419 extending from the dorso-temporal area to the ventral-temporal area. In adults, the horizontal  
420 streak in the central meridian was still present but did not extend as far into the nasal part as  
421 in the juveniles. Moreover, the vertical streak was more prominent compared to the one  
422 found in juveniles resulting in a large area of high cell density in the temporal region (Fig.  
423 3B). The continuous nature of the transition between juvenile and adult specializations is  
424 highlighted by the topography of individuals of intermediate sizes (Figs. S3-S5). For  
425 example, the horizontal streak was less pronounced in the nasal part of a larger (Fig. S3c)  
426 compared to a smaller juvenile (Fig. S3d). Conversely, the vertical streak in a smaller adult  
427 (Fig. S3b) was still developing compared to the one found in a larger adult (Fig. S3a).

428 Similar to the ganglion cells (Table 1), the total number of photoreceptors increased  
429 with the size of the fish ranging from ~650,000 cells in larvae, over ~4,300,000 cells in  
430 juveniles, to ~5,700,000 cells in adults (Table 2). A large difference in the total number of  
431 photoreceptors was found between the two juvenile individuals. This difference is likely due  
432 to the size difference between these individuals. Photoreceptor peak cell densities decreased  
433 with the size of the fish, ranging from ~69,000 cells/mm<sup>2</sup> in larvae, over ~51,000 cells/mm<sup>2</sup>  
434 in juveniles, to ~34,000 in cells/mm<sup>2</sup> in adults (Table 2).

435 The total number of cone photoreceptors was greater compared to the total number of  
436 ganglion cells, indicating a high summation ratio between the two cell types. For one  
437 individual (larva ID3), the distribution of both ganglion cells and photoreceptors were

438 analysed, which allowed to estimate the summation ratio between photoreceptors and  
439 ganglion cells in low- and high-density areas, respectively. For this individual, the summation  
440 ratio was found to be as low as 2.3 in the central part and as high as 5.4 in the ventral-  
441 temporal part of the retina.

442

#### 443 *Visual opsin genes and their expression in Naso brevirostris*

444 *N. brevirostris* were found to mainly express four opsin genes in their retinas. Independent of  
445 ontogeny, these were the ‘blue-violet’ *SWS2B*, the ‘greens’ *RH2B* & *RH2A*, and the rod opsin  
446 *RHI*. The ‘red’ *LWS* was also found to be expressed, albeit at very low levels in all stages  
447 (0.1 – 6.5 % of total double cone opsin expression; Fig. 6A, Table S3). The phylogenetic  
448 reconstruction based on the full coding regions of the genes confirmed the positioning of all  
449 genes within their respective opsin class (Fig. 4). However, for *RH2B* in particular the  
450 resolution between *RH2* specific clades was poor (Fig. 4, Fig. S6). This was resolved using  
451 the exon-based approach which showed the placement of some of the *N. brevirostris* *RH2B*  
452 exons within a greater percomorph *RH2B* clade (Fig. 5A). Moreover, we found evidence for  
453 substantial gene conversion affecting this gene with the placement of Exons 1 and 2 close to,  
454 or within, the *RH2A* clade (Fig. 5B).

455 Quantitative opsin gene expression revealed that *SWS2B* was the only single cone  
456 gene and thus, expressed at 100% in all developmental stages (Table S3). Of the double cone  
457 opsins, there was a change in expression for the *RH2* genes with ontogeny. During the larval  
458 stage (n = 3), *RH2B* (mean  $\pm$  s.e.,  $36.2 \pm 4.8\%$ ) was less highly expressed compared to *RH2A*  
459 ( $63.6 \pm 4.8\%$ ). The opposite pattern was found in the juvenile (n = 6) and adult stages (n = 3),  
460 where *RH2B* was the highest expressed of all double cone opsins genes (juvenile:  $56 \pm 1.3\%$ ;  
461 adult:  $56.1 \pm 1.9\%$ ). *RH2A* in the juvenile ( $41.2 \pm 1.4\%$ ) and adult ( $38.1 \pm 1.6\%$ ) stages was  
462 less highly expressed. Despite *LWS* being lowly expressed in all stages, there was a  
463 noticeable increase in expression with development (larval:  $0.2 \pm 0.0\%$ ; juvenile:  $2.8 \pm 0.7\%$ ;  
464 adult  $5.8 \pm 0.4\%$ ; Fig. 6A). Rod opsin (*RHI*) expression was substantially higher compared to  
465 the cone opsin expression in all stages (82 – 86% for all stages) (Fig. 6B).

466

#### 467 **Discussion**

468 The visual systems of fishes often change through development when transitioning from one  
469 habitat to another. These changes are usually associated with a shift in light environment e.g.,  
470 when moving from the open ocean to a coral reef, but possibly also with changes in diet and  
471 predation pressure (Sale 2013). Our objective was to assess the visual system development in

472 the spotted unicornfish, *N. brevirostris*. *N. brevirostris* experiences multiple changes in  
473 habitat, diet and morphology throughout ontogeny (from larval to adult stages; Fig. 1)  
474 making it a prime candidate to study visual system changes on the reef.

475

#### 476 *Ganglion cell topography*

477 Retinal topography is an effective method to identify visual specializations and recognise the  
478 area of the visual field a species is most interested in (Hughes 1977; Collin and Pettigrew  
479 1988a; Collin 2008). In marine fishes, visual specializations have been found to correlate  
480 with the structure and symmetry of the environment they live in and/or with their feeding  
481 behaviour (Collin and Pettigrew 1988a, 1988b; Ito and Murakami 1984; Shand 1997; Caves  
482 *et al.* 2017). In this study we show that the *N. brevirostris* eye possesses a horizontal streak in  
483 all life stages (Fig. 3A). This type of specialization has previously been found in species  
484 living in open environments where an uninterrupted view of the horizon, defined by the sand-  
485 water or air-water interface, is present (Collin and Pettigrew 1988b). Since *N. brevirostris*  
486 spends much of its life (larval and adult stages) searching for prey in the water column,  
487 having a pronounced horizontal streak is likely to increase feeding and predator surveillance  
488 capabilities by allowing it to scan the horizon without using excessive eye movements (Collin  
489 and Shand 2003). Moreover, at the larval stage this type of specialization may also enable  
490 fish to scan the environment when searching for a reef habitat to settle on. On the contrary, a  
491 horizontal streak does not seem to match the visual needs at the juvenile stage during which  
492 *N. brevirostris* lives in close association with the reef i.e., in a more enclosed 3D  
493 environment. At this life stage, we would have expected to find one (or multiple) area  
494 centralis and no horizontal streak; a common feature in fishes that live close to, or within the  
495 reef matrix (Collin and Pettigrew 1988a; Collin and Pettigrew 1988c). Compared to the  
496 lifespan of these fishes (up to 20 years), the juvenile stage is relatively short (~ 3 years; Choat  
497 and Axe 1996), which may explain the maintenance of the horizontal streak throughout  
498 development.

499 On top of having a well-defined streak, the ganglion cells in the juvenile and adult  
500 stages also formed an area centralis in the central part of the retina (Fig. 3A). This is very  
501 unusual, as in coral reef fishes an area centralis is normally found in the temporal zone. Such  
502 a temporal area centralis receives information from the nasal visual field, and thus is usually  
503 correlated with feeding and predator avoidance in front of the fish (Collin and Pettigrew  
504 1988a; Collin and Pettigrew 1989; Fritsch *et al.* 2017; Fritsches *et al.* 2003; Shand *et al.*  
505 2000). The type of specialization found in *N. brevirostris* seems to be correlated with its

506 unusual visual behaviour as fishes are found to examine objects side-on (V.T. pers.  
507 observation). A possible explanation for this peculiar behaviour is that due to its protruded  
508 snout, which grows through development, the frontal image might be partially blocked and  
509 stereoscopic vision may be impaired or even impossible (Purcell and Bellwood 1993).  
510 Although the visual field of *N. brevirostris* was not investigated in this study, Brandl and  
511 Bellwood 2013 suggested that the protruded snout found in many *Naso* species indeed  
512 prevents an overlap of their horizontal field of view. Similar to the monocular vision found in  
513 hammerhead sharks (McComb *et al.* 2009; Lisney and Collin 2008), increasing visual acuity  
514 in the central part of the retina would thus maximise a sideward oriented visual field.  
515 Together with a pronounced visual streak, these two specializations are likely to enable *N.*  
516 *brevirostris* to accurately navigate both within the complexity of the reef as well as in open  
517 water.

518

#### 519 *Photoreceptor topography*

520 Similar to the ganglion cell topography, the photoreceptor topography also varied mostly  
521 between the larval and subsequent stages (Fig. 3B). Larval fishes had two well defined area  
522 centralis in the nasal and temporal zones, which comply with two of their main ecological  
523 needs: feeding (temporal; looking forward) and predator avoidance (nasal; looking  
524 backwards) (Collin and Pettigrew 1988a; Fortier and Harris 1989; Boehlert 1996). These  
525 high-density regions were not matched by the ganglion cell topography and as such, are  
526 likely to provide areas of higher sensitivity (i.e., areas of high photoreceptor to ganglion cell  
527 ratio; Walls 1942). Moreover, although larval fishes rely mainly on olfactory cues to zoom in  
528 on a suitable habitat for settlement (Lecchini *et al.* 2005b), the temporal area centralis in  
529 particular might also assist when searching for said habitat over longer distances (Mouritsen  
530 *et al.* 2013).

531 The two area centralis were no longer present in bigger fishes, but instead, at the  
532 juvenile and adult stage, *N. brevirostris* showed a pronounced horizontal streak (Fig. 3B).  
533 Additionally, a temporal vertical specialization became apparent at the juvenile stage and  
534 more pronounced in adults. Such a double streak specialization, with a vertical and a  
535 horizontal component, is a first in coral reef fishes. *N. brevirostris* adults live on the coral  
536 reef slope/wall, and move up and down the wall (from 2 - 122 m) while foraging and  
537 searching for mates (Mundy 2005). As such, in line with the terrain hypothesis (Hughes  
538 1977), the evolution of this vertical specialization is likely a result of the vertical component  
539 in their visual environment.



540 A difference in the topography of ganglion cells and photoreceptors means that the  
541 summation ratio between the cell types i.e., the sensitivity and spatial resolution of the  
542 retina, also differs depending on the visual field in question. For example, high photoreceptor  
543 densities and comparable low ganglion cell densities in the ventral-temporal and dorsal-  
544 temporal parts of the vertical streak confer higher sensitivity to these two areas (Walls 1942).  
545 Theoretically, this enables juvenile and adult *N. brevirostris* to detect even small differences  
546 in luminance, which may help to detect well camouflaged predators against the reef wall. A  
547 high density of both photoreceptor and ganglion cells found in the centre of the retina, on the  
548 other hand, confers a low summation ratio which leads to an increase in visual acuity (Walls  
549 1942). This area of high acuity may help fish to identify conspecifics and also to distinguish  
550 between food items (Cronin *et al.* 2014).

551 To summarize, the photoreceptor topographies of *N. brevirostris* may be adapted to  
552 the habitat in both the larval and the adult stage. Juveniles live in a more enclosed, 3D coral  
553 reef environment compared to the other two life stages. Therefore, we would have expected  
554 the juvenile visual system to reflect its habitat by having a less developed streak and a more  
555 pronounced area centralis. Similar to the ganglion cell topography, the lack of a distinct area  
556 centralis in the retina may be explained by the juvenile stage only lasting a fraction of the  
557 lifespan of *N. brevirostris* (Choat and Axe 1996). The relatively short period of time spent in  
558 a habitat rich in shelter and food enables the fish to grow big enough to avoid most predators  
559 (Lasiak 1986; Barnes and H ghes 1999). During this time, juvenile *N. brevirostris* mostly  
560 feed on benthic algae, which do not require a highly specialized visual system in terms of  
561 retinal topography (Randall *et al.* 1997; Collin and Pettigrew 1988b, 1988a; Caves *et al.*  
562 2017). A such, instead of changing the visual system multiple times, it is likely more energy  
563 efficient to maintain (or slightly adjust) a visual system that is optimally adapted for both the  
564 larval and adult stages.

565

#### 566 *Visual acuity*

567 The visual acuity of *N. brevirostris* was found to increase through development (Table 1).  
568 This seems to be a common feature in coral reef fishes, as a higher acuity often correlates  
569 with an increase in eye size during growth. The benefit of having a higher visual acuity is  
570 that, as fishes grow and expand their home ranges, it increases the distance at which visual  
571 objects such as predators, conspecifics, and food can be detected (Shand 1997; Caves *et al.*  
572 2017). Accordingly, like in other coral reef fish larvae (Shand 1997), the acuity of *N.*  
573 *brevirostris* larvae was relatively poor (2.98 cycles per degree). The overabundance of

574 zooplankton in their habitat means that larval coral reef fishes can wander instead of using a  
575 lock-and-pursuit feeding behaviour i.e., they do not need to spot their food from a distance,  
576 but rather bump into it while floating in the plankton (Fortier and Harris 1989; Evans and  
577 Fernald 1990). Once settled on the reef, the visual acuity of *N. brevirostris* starts to increase  
578 in line with their growth (Fig. S5). Adult *N. brevirostris* were found to have a similar visual  
579 acuity (~11 cycles per degree) to other reef fishes of that size such as in the clown triggerfish,  
580 *Balistoides conspicillus*; a species that also inhabits the reef slope and shows a pronounced  
581 horizontal streak (Collin and Pettigrew 1989).

582

### 583 *Opsin gene evolution*

584 Phylogenetic reconstruction showed that the *N. brevirostris* visual opsins belong to the opsin  
585 gene clades usually found within percomorph fishes (Fig. 4). However, within the *RH2*  
586 genes, an exon-based phylogeny revealed that the *N. brevirostris RH2B* gene is likely to have  
587 undergone substantial gene conversion (Fig. 5). As such, it occurs that parts of its first and  
588 second exon have been acquired from the *RH2A* paralog explaining its phylogenetic  
589 uncertainty when using whole coding region-based reconstructions (Fig. 4, Fig. S6). This is  
590 not that surprising, since *RH2* duplicates in teleosts are commonly found in tandem (e.g.,  
591 Musilova *et al.* 2019) and, as is the case for other teleost opsin genes (Cortesi *et al.* 2015b;  
592 Hofmann and Carleton 2009), frequently experience gene conversion (Cortesi *et al.* 2015b;  
593 Escobar-Camacho *et al.* 2016; Hofmann *et al.* 2012). This phenomenon is thought to be one  
594 of the main mechanism for concerted evolution in small gene families which often originate  
595 from tandem duplications (Ohta 1983; Li 1997) and could help to preserve gene function by  
596 repairing null-mutations (Innan 2009) or by resurrecting previously pseudogenized gene  
597 copies (Cortesi *et al.* 2015b). Since the *RH2* opsin genes are highly expressed in *N.*  
598 *brevirostris* they seem rather important for their visual ecology, and it is therefore likely that  
599 gene conversion played a major evolutionary role in maintaining their function.

600

### 601 *Heterochrony of opsin gene expression*

602 Based on opsin gene expression, *N. brevirostris* could be behaviourally trichromatic (i.e. has  
603 three spectral sensitivities) for all three developmental stages, with the ‘violet’ *SWS2B*, and  
604 the ‘blue-green’ *RH2B* and *RH2A* genes being expressed in sufficient quantity to enable this  
605 level of chromatic analysis. Supporting these findings, microspectrophotometry (MSP) in  
606 adults of two closely related *Naso* species (*N. literatus* and *N. unicornis*; Sorenson *et al.*  
607 2013) found three cone photoreceptors with spectral sensitivities ~ 420 nm  $\lambda_{\max}$  for single

608 cones, and  $\sim 490$  nm  $\lambda_{\max}$  and  $\sim 515$  nm  $\lambda_{\max}$  for the accessory and principle members of  
609 double cones, respectively (Losey *et al.* 2003). A short-shifted visual system with high  
610 sensitivity in the violet to green range might benefit feeding on zooplankton and gelatinous  
611 prey during the larval and adult stages of *N. brevirostris* (Marshall *et al.* 2003). However, it  
612 seems at odds with the mainly algivorous diet of the juvenile stage, where a red-shifted visual  
613 system would be of advantage (Stieb *et al.* 2017; Cortesi *et al.* 2018).

614 Ontogenetic studies on opsin gene expression in African cichlids highlighted three  
615 main developmental patterns: i) a ‘normal’ development with a display of different gene sets  
616 in the larval, juvenile and adult stages; ii) a neotenic development in which the fish retains  
617 the larval opsin gene expression throughout its life, or slowly progresses to a slightly  
618 different juvenile opsin set; and, iii) a direct development with the fish expressing the adult  
619 gene set already at the larval stage (Carleton *et al.* 2008; O’Quin *et al.* 2011). Neotenic and  
620 direct development are forms of heterochrony (O’Quin *et al.* 2011). In *N. brevirostris*, we  
621 would have expected scenario i), with different opsin sets expressed at different life stages as  
622 a consequence of being exposed to varying environments and feeding habits through  
623 development. Conversely, we found evidence for a neotenic development (scenario ii), with a  
624 slight shift in opsin gene expression between the larval and the juvenile stages (decrease in  
625 *RH2A* and increase in *RH2B* expression), which was then retained through to the adult stage  
626 (Fig. 5). Neoteny in opsin gene expression was also found in some cichlids from Lake  
627 Malawi (Carleton and Kocher 2001; Carleton *et al.* 2008). Similar to the light environment  
628 found on the reef (Marshall *et al.* 2003), these fishes inhabit clear water lakes throughout  
629 their life (Carleton *et al.* 2008). The consistency in photic habitat as well as zooplanktivory  
630 are thought to drive the neotenic development in these cichlids (Carleton *et al.* 2008).  
631 Likewise, feeding on zooplankton during larval and adult stages as well as little changes in  
632 light habitat post settlement might be responsible for the neotenic expression patterns found  
633 in *N. brevirostris*. Supporting the molecular findings, the retinal topography, and especially  
634 the ganglion cell topography, also showed a neotenic development, changing slightly from  
635 the larval to the juvenile stage with no major changes thereafter (Fig. 3).

636 A shift in the expression of *RH2B* and *RH2A*, as seen between the larval and later *N.*  
637 *brevirostris* stages, can also be found in coral reef damselfishes (Pomacentridae) (Stieb *et al.*  
638 2016). On shallow, clear coral reefs a broad spectrum of light is available (Marshall *et al.*  
639 2003). However, with increasing depth the long and short ends of the spectrum are cut off  
640 due to absorption and scattering through interfering particles, resulting in a blue mid-  
641 wavelength saturated light environment (Smith and Baker 1981). Consequently, in an attempt

642 to maximise photon catch, some damselfish species were found to increase the expression of  
643 the blue-sensitive *RH2B* gene and simultaneously decrease the expression of the green-  
644 sensitive *RH2A* gene with increasing depth (Stieb *et al.* 2016). In *N. brevirostris*, the shift in  
645 expression of *RH2* genes occurs between the larval and juvenile stages where depth  
646 differences do not seem that relevant. In lieu of depth, individuals migrate from a pelagic  
647 blue-shifted open water environment to the more green-shifted light environment of the coral  
648 reef (Marshall *et al.* 2003). This could in theory explain the high *RH2A* expression in larval  
649 fish at the settlement stage, however, it does not explain the increase in *RH2B* expression post  
650 settlement (Fig. 6A). An increasing number of fishes are found to change their opsin gene  
651 expression to tune photoreceptors to the prevailing photic environment (e.g., Fuller *et al.*  
652 2004; Hofmann *et al.* 2010; Nandamuri *et al.* 2017; Shand *et al.* 2008; Stieb *et al.* 2016;  
653 Luehrmann *et al.* 2018; Härer *et al.* 2017). At the opposite end of the spectrum, opsin gene  
654 expression might be pre-programmed either by phylogeny or on a species by species basis, as  
655 exemplified by only some damselfishes changing expression with depth (Stieb *et al.* 2016). It  
656 is therefore possible that opsin gene expression in *N. brevirostris* is under phylogenetic  
657 control and that changes in photic environment contribute very little to opsin gene expression  
658 in this case.

659 *N. brevirostris* was not found to express the UV-sensitive *SWS1* gene at any of the  
660 developmental stages. *SWS1* expression is often found in larval fishes and more generally in  
661 fishes feeding on zooplankton, with UV-vision thought to increase the detectability of this  
662 food source (Sabbah *et al.* 2010; Novales-Flamarique and Hawryshyn 1994). Since *N.*  
663 *brevirostris* feeds on zooplankton at both larval and adult stages (Choat *et al.* 2002; Choat *et*  
664 *al.* 2004), the lack of *SWS1* expression seems striking. However, it does support ocular media  
665 measurements which revealed UV-blocking lenses in both larval and adult *N. brevirostris*  
666 (Siebeck and Marshall 2007). UV-blocking lenses seem common in many bigger coral reef  
667 fishes, which is thought to enhance sighting distance by reducing chromatic aberration and  
668 scatter, as well as protecting the eye from the damage caused by these high intensity  
669 wavelengths (Siebeck and Marshall 2001). Instead, the expression of the violet sensitive  
670 *SWS2B* gene, since its spectral absorption curve reaches into the near-UV (Losey *et al.* 2003),  
671 may be sufficient to increase the discrimination of zooplankton from the water background  
672 while foraging.

673 We furthermore found low expression of the red-sensitive *LWS* gene (<6%) at all  
674 developmental stages. This suggests that *LWS* expression is either restricted to certain areas  
675 of the retina, interspersed at low frequency across the retina, or some photoreceptors might

676 co-express *LWS* with an *RH2* gene (e.g., Dalton *et al.* 2014; Cortesi *et al.* 2016; Torres-  
677 Dowdall *et al.* 2017). MSP in related *Naso* species did not show any long-wavelength-  
678 sensitive photoreceptors, nor did it show any evidence for opsin co-expression (i.e., red-  
679 shifted unusually broad absorbance peaks) (Losey *et al.* 2003). Since this technique only  
680 samples as subset of the photoreceptors across the retina, it might be that the photoreceptors  
681 containing this pigment were missed due to their low number or that *LWS* was simply not  
682 expressed in these fishes.

683         It is possible that the *LWS* expression found here is just a by-product of the way opsin  
684 gene expression is controlled and that it does not serve any ecological function. Nevertheless,  
685 *LWS* expression did increase with development. Hence, an alternative explanation might be  
686 that *LWS* is co-expressed with an *RH2* gene, which has been shown to increase achromatic  
687 discrimination in cichlids (Dalton *et al.* 2014). Moreover, *LWS* expression has recently been  
688 shown to be correlated to algal feeding in damselfishes (Stieb *et al.* 2017), and blennies  
689 (Cortesi *et al.* 2018). Since *N. brevirostris* juveniles feed on algal turf, a slight increase in  
690 *LWS* expression at this stage, may improve feeding efficiency due to the increased contrast of  
691 algae against the reef background (Stieb *et al.* 2017; Marshall *et al.* 2003; Cortesi *et al.*  
692 2015a). In situ hybridisation studies (e.g., Dalton *et al.* 2014, 2016; Torres-Dowdall *et al.*  
693 2017; Stieb *et al.* 2019) coupled with behavioural colour-vision experiments (e.g., Cheney *et*  
694 *al.* 2019) will be needed in the future to assess the distribution and function of the various  
695 opsin genes and ultimately the colour vision system of *N. brevirostris*.

## 696 697 *Conclusion*

698 Using a multidisciplinary approach, we analysed the ontogeny of the visual system of *Naso*  
699 *brevirostris*. Minor ontogenetic changes in retinal topographies and opsin gene expression  
700 were only found after the larval stage, which did not match the initial hypothesis of an  
701 adaptation to each developmental stage. Therefore, both retinal topography and opsin  
702 expression undergo a neotenic development already possessing the adult, ‘final’ visual  
703 system early on in development. This is contrary to what was found in other reef fishes  
704 (Shand *et al.* 2008; Suresh and Julia 2001; Cortesi *et al.* 2016) and highlights the need for a  
705 comprehensive analysis of visual ontogeny across the reef fish community.

## 706 707 **Acknowledgements**

708 We would like to thank Sara Stieb, Vivian Rothenberger, Simon Dunn, and the staff of  
709 Tetiaroa Society (Moana LeRohellec) and of CRIOBE (Camille Gache) for assistance with

710 specimen collection. We furthermore thank the staff at the Lizard Island Research Station for  
711 logistical support, and Janette Edson from the Queensland Brain Institute's (QBI) sequencing  
712 facility for library preparation and RNA sequencing. We also acknowledge QBI's Advanced  
713 Microscopy Facility for the use of the Stereo Investigator (software v. 2017.01.1),  
714 generously supported by the Australian Government through the ARC LIEF grant  
715 LE100100074.

716

### 717 **Competing Interests**

718 The authors declare no competing interests.

719

### 720 **Funding**

721 This study was funded by the Sea World Research & Rescue Foundation Inc., an Australian  
722 Research Council Discovery Project Grant (ARC DP180102363), and by the Tetiaroa  
723 Society, the Leonardo Di Caprio Foundation and Mission Blue for the CRIOBE study at  
724 Tetiaroa . F.d.B. was supported by an ARC DECRA Fellowship (DE180100949), N.J.M. by  
725 an ARC Laureate Fellowship, and F.C. by a UQ Development Fellowship.

726

### 727 **Author Contributions**

728 F. C. conceived the study and designed the experiments together with F.d.B and N.J.M. V.T.,  
729 F.d.B and F.C. performed the experiments and analysed the data. All authors contributed to  
730 specimen collection. V.T. wrote the initial draft of the manuscript and all authors agreed to  
731 the final version of the manuscript.

732

### 733 **Data Accessibility**

734 Raw-read transcriptomes (PRJ tba) and single gene sequences (#tba) are available through  
735 GenBank (<https://www.ncbi.nlm.nih.gov/genbank/>). Gene alignments and single gene  
736 phylogenies can be accessed through Dryad (#tba). All other data is given either in the main  
737 manuscript or the supplementary material.

738

739 **References**

- 740 Afgan, Enis, Clare Sloggett, Nuwan Goonasekera, Igor Makunin, Derek Benson, Mark  
741 Crowe, Simon Gladman, Yousef Kowsar, Michael Pheasant, Ron Horst, and Andrew  
742 Lonie. 2015. 'Genomics Virtual Laboratory: A practical bioinformatics workbench for  
743 the Cloud', *PLOS ONE*, 10: e0140829.
- 744 Baddeley, Adrian, and Rolf Turner. 2005. 'Spatstat: an R package for analyzing spatial point  
745 patterns', *Journal of statistical software*, 12: 1-42.
- 746 Bailes, H. J., A. E. Trezise, and S. P. Collin. 2006. 'The number, morphology, and  
747 distribution of retinal ganglion cells and optic axons in the Australian lungfish  
748 *Neoceratodus forsteri* (Kreffit 1870)', *Vis Neurosci*, 23: 257-73.
- 749 Barnes, Richard Stephen Kent, and Roger N Hughes. 1999. *An introduction to marine  
750 ecology* (John Wiley & Sons).
- 751 Besson, Marc, Camille Gache, Rohan M Brooker, Rakamaly Madi Moussa, Viliame Pita  
752 Waqalevu, Moana LeRohellec, Vincent Jaouen, Kévin Peyrusse, Cécile Berthe,  
753 Frédéric Bertucci, Hugo Jacob, Christophe Brié, Bruno Wan, René Galzin, and David  
754 Lecchini. 2017. 'Consistency in the supply of larval fishes among coral reefs in  
755 French Polynesia', *Plos One*, 12: e0178795.
- 756 Boehlert, George W. 1996. 'Larval dispersal and survival in tropical reef fishes.' in Nicholas  
757 V. C. Polunin and Callum M. Roberts (eds.), *Reef Fisheries* (Springer Netherlands:  
758 Dordrecht).
- 759 Bolger, Anthony M, Marc Lohse, and Bjoern Usadel. 2014. 'Trimmomatic: a flexible trimmer  
760 for Illumina sequence data', *Bioinformatics*, 30: 2114-20.
- 761 Bowmaker, James K. 2008. 'Evolution of vertebrate visual pigments', *Vision Research*, 48:  
762 2022-41.
- 763 Bowmaker, J K, and Y.W. Kunz. 1987. 'Ultraviolet receptors, tetrachromatic colour vision  
764 and retinal mosaics in the brown trout (*Salmo trutta*): age-dependent changes', *Vision  
765 Research*, 27: 2101-08.
- 766 Bozzano, Anna, and Shaun P Collin. 2000. 'Retinal ganglion cell topography in  
767 elasmobranchs', *Brain, Behavior and Evolution*, 55: 191-208.
- 768 Brandl, Simon J., and David R. Bellwood. 2013. 'Morphology, sociality, and ecology: can  
769 morphology predict pairing behavior in coral reef fishes?', *Coral Reefs*, 32: 835-46.
- 770 Carleton, Karen L, and Thomas D Kocher. 2001. 'Cone opsin genes of African cichlid fishes:  
771 tuning spectral sensitivity by differential gene expression', *Molecular biology and  
772 evolution*, 18: 1540-50.

- 773 Carleton, Karen L., Tyrone C. Spady, J. Todd Streebman, Michael R. Kidd, William N.  
774 McFarland, and Ellis R. Loew. 2008. 'Visual sensitivities tuned by heterochronic  
775 shifts in opsin gene expression', *BMC Biology*, 6: 22.
- 776 Caves, Eleanor M., Tracey T. Sutton, and Sönke Johnsen. 2017. 'Visual acuity in ray-finned  
777 fishes correlates with eye size and habitat', *The Journal of Experimental Biology*, 220:  
778 1586.
- 779 Cheney, Karen L., Naomi F. Green, Alexander P. Vibert, Misha Vorobyev, N. Justin Marshall,  
780 Daniel C. Osorio, and John A. Endler. 2019. 'An Ishihara-style test of animal colour  
781 vision', *Journal of Experimental Biology* 222: jeb189787.
- 782 Choat, J., K. Clements, and W. Robbins. 2002. 'The trophic status of herbivorous fishes on  
783 coral reefs. I. Dietary analyses', *Marine Biology*, 140: 613-23.
- 784 Choat, J. Howard, William D. Robbins, and Kendall D. Clements. 2004. 'The trophic status  
785 of herbivorous fishes on coral reefs. II. Food processing modes and trophodynamics',  
786 *Marine Biology*, 145: 445-54.
- 787 Choat, J. H., and L. M. J. Axe. 1996. 'Growth and longevity in acanthurid fishes; an analysis  
788 of otolith increments', *Marine Ecology Progress Series*, 134: 15-26.
- 789 Coimbra, J. P., M. L. Marceliano, B. L. Andrade-da-Costa, and E. S. Yamada. 2006. 'The  
790 retina of tyrant flycatchers: topographic organization of neuronal density and size in  
791 the ganglion cell layer of the great kiskadee *Pitangus sulphuratus* and the rusty  
792 margined flycatcher *Myiozetetes cayanensis* (Aves: Tyrannidae)', *Brain Behavior and  
793 Evolution*, 68: 15-25.
- 794 Coimbra, J. P., P. M. Nolan, S. P. Collin, and N. S. Hart. 2012. 'Retinal ganglion cell  
795 topography and spatial resolving power in penguins', *Brain Behavior and Evolution*,  
796 80: 254-68.
- 797 Coimbra, João Paulo, Nonata Trévia, Maria Luiza Videira Marceliano, Belmira Lara da  
798 Silveira Andrade-Da-Costa, Cristovam Wanderley Picanço-Diniz, and Elizabeth Sumi  
799 Yamada. 2009. 'Number and distribution of neurons in the retinal ganglion cell layer  
800 in relation to foraging behaviors of tyrant flycatchers', *Journal of Comparative  
801 Neurology*, 514: 66-73.
- 802 Collin, S. P., and J. D. Pettigrew. 1988a. 'Retinal topography in reef teleosts. I. Some species  
803 with well-developed areae but poorly-developed streaks', *Brain Behavior and  
804 Evolution*, 31: 269-82.



- 805 Collin, S. P., and J. D. Pettigrew. 1988b. 'Retinal topography in reef teleosts. II. Some species  
806 with prominent horizontal streaks and high-density areas', *Brain Behavior Evolution*,  
807 31: 283-95.
- 808 Collin, Shaun P. 2008. 'A web-based archive for topographic maps of retinal cell distribution  
809 in vertebrates', *Clinical and Experimental Optometry*, 91: 85-95.
- 810 Collin, Shaun P, and John D Pettigrew. 1988c. 'Retinal ganglion cell topography in teleosts:  
811 A comparison between nissl-stained material and retrograde labelling from the optic  
812 nerve', *Journal of Comparative Neurology*, 276: 412-22.
- 813 Collin, Shaun P, and John D Pettigrew. 1989. 'Quantitative comparison of the limits on visual  
814 spatial resolution set by the ganglion cell layer in twelve species of reef teleosts',  
815 *Brain, Behavior and Evolution*, 34: 184-92.
- 816 Collin, Shaun P., and Julia Shand. 2003. 'Retinal sampling and the visual field in fishes.' in  
817 Shaun P. Collin and N. Justin Marshall (eds.), *Sensory Processing in Aquatic*  
818 *Environments* (Springer New York: New York, NY).
- 819 Collin, SP. 1988. 'The retina of the shovel-nosed ray, *Rhinobatos batillum* (Rhinobatidae):  
820 morphology and quantitative analysis of the ganglion, amacrine and bipolar cell  
821 populations', *Experimental biology*, 47: 195-207.
- 822 Cortesi, F., Karen L. Cheney, Georgina M. Cooke, and Terry Ord. 2018. 'Opsin gene evolution  
823 in amphibious and terrestrial combtooth blennies (Blenniidae) ', *bioRxiv*, 503516.
- 824 Cortesi, Fabio, William E Feeney, Maud CO Ferrari, Peter A Waldie, Genevieve AC Phillips,  
825 Eva C McClure, Helen N Sköld, Walter Salzburger, N Justin Marshall, and Karen L  
826 Cheney. 2015a. 'Phenotypic plasticity confers multiple fitness benefits to a mimic',  
827 *Current Biology*, 25: 949-54.
- 828 Cortesi, Fabio, Zuzana Musilová, Sara M Stieb, Nathan S Hart, Ulrike E Siebeck, Karen L  
829 Cheney, Walter Salzburger, and N Justin Marshall. 2016. 'From crypsis to mimicry:  
830 changes in colour and the configuration of the visual system during ontogenetic  
831 habitat transitions in a coral reef fish', *Journal of Experimental Biology*: jeb. 139501.
- 832 Cortesi, Fabio, Zuzana Musilová, Sara M. Stieb, Nathan S. Hart, Ulrike E. Siebeck, Martin  
833 Malmstrøm, Ole K. Tørresen, Sissel Jentoft, Karen L. Cheney, N. Justin Marshall,  
834 Karen L. Carleton, and Walter Salzburger. 2015b. 'Ancestral duplications and highly  
835 dynamic opsin gene evolution in percomorph fishes', *Proceedings of the National*  
836 *Academy of Sciences*, 112: 1493.
- 837 Cronin, Thomas W, Sönke Johnsen, N Justin Marshall, and Eric J Warrant. 2014. *Visual*  
838 *ecology* (Princeton University Press).

- 839 Dalton, Brian E., Fanny de Busserolles, N. Justin Marshall, and Karen L. Carleton. 2016.  
840 'Retinal specialization through spatially varying cell densities and opsin coexpression  
841 in cichlid fish', *The Journal of Experimental Biology*.
- 842 Dalton, Brian E., Ellis R. Loew, Thomas W. Cronin, and Karen L. Carleton. 2014. 'Spectral  
843 tuning by opsin coexpression in retinal regions that view different parts of the visual  
844 field', *Proceedings of the Royal Society B: Biological Sciences*, 281.
- 845 Darriba, Diego, Guillermo L Taboada, Ramón Doallo, and David Posada. 2012. 'jModelTest  
846 2: more models, new heuristics and parallel computing', *Nature methods*, 9: 772.
- 847 de Busserolles, F., F. Cortesi, J. V. Helvik, W. I. L. Davies, R. M. Templin, R. K. P. Sullivan,  
848 C. T. Michell, J. K. Mountford, S. P. Collin, X. Irigoien, S. Kaartvedt, and J.  
849 Marshall. 2017. 'Pushing the limits of photoreception in twilight conditions: The rod-  
850 like cone retina of the deep-sea pearlsides', *Science Advances*, 3: eaao4709.
- 851 de Busserolles, F., N. J. Marshall, and S. P. Collin. 2014a. 'Retinal ganglion cell distribution  
852 and spatial resolving power in deep-sea lanternfishes (Myctophidae)', *Brain, Behavior  
853 and Evolution*, 84: 262-76.
- 854 de Busserolles, Fanny, John L. Fitzpatrick, N. Justin Marshall, and Shaun P. Collin. 2014b.  
855 'The influence of photoreceptor size and distribution on optical sensitivity in the eyes  
856 of lanternfishes (Myctophidae)', *PLOS ONE*, 9: e99957.
- 857 Endler, John A. 1990. 'On the measurement and classification of colour in studies of animal  
858 colour patterns', *Biological Journal of the Linnean Society*, 41: 315-52.
- 859 Escobar-Camacho, Daniel, Erica Ramos, Cesar Martins, and Karen L. Carleton. 2016. 'The  
860 opsin genes of amazonian cichlids', *Molecular ecology*, 26: 1343-56.
- 861 Evans, Barbara I, and Russell D Fernald. 1990. 'Metamorphosis and fish vision', *Journal of  
862 Neurobiology*, 21: 1037-52.
- 863 Fernald, Russell D. 1988. "Aquatic adaptations in fish eyes." In *Sensory Biology of Aquatic  
864 Animals*, edited by Jelle Atema, Richard R. Fay, Arthur N. Popper and William N.  
865 Tavolga, 435-66. New York, NY: Springer New York.
- 866 Fortier, Louis, and Roger P. Harris. 1989. 'Optimal foraging and density-dependent  
867 competition in marine fish larvae', *Marine Ecology Progress Series*, 51: 19-33.
- 868 Fritsch, Roland, Shaun P Collin, and Nico K Michiels. 2017. 'Anatomical analysis of the  
869 retinal specializations to a crypto-benthic, micro-predatory lifestyle in the  
870 Mediterranean triplefin blenny *Tripterygion delaisi*', *Biological Journal of the  
871 Linnean Society*, 11: 122.

- 872 Fritsches, Kerstin A, N Justin Marshall, Eric Warrant. 2003. 'Retinal specializations in the  
873 blue marlin: eyes designed for sensitivity to low light levels', *Marine and Freshwater  
874 Research*, 54: 333-41.
- 875 Fuller, RC, KL Carleton, JM Fadool, TC Spady, and J Travis. 2004. 'Population variation in  
876 opsin expression in the bluefin killifish, *Lucania goodei*: a real-time PCR study',  
877 *Journal of Comparative Physiology A*, 190: 147-54.
- 878 Garza-Gisholt, Eduardo, Jan M Hemmi, Nathan S Hart, and Shaun P Collin. 2014. 'A  
879 comparison of spatial analysis methods for the construction of topographic maps of  
880 retinal cell density', *PLOS ONE*, 9: e93485.
- 881 Glaser, EM, and PD Wilson. 1998. 'The coefficient of error of optical fractionator population  
882 size estimates: a computer simulation comparing three estimators', *Journal of  
883 Microscopy*, 192: 163-71.
- 884 Haas, Brian J, Alexie Papanicolaou, Moran Yassour, Manfred Grabherr, Philip D Blood,  
885 Joshua Bowden, Matthew Brian Couger, David Eccles, Bo Li, and Matthias Lieber.  
886 2013. 'De novo transcript sequence reconstruction from RNA-seq using the Trinity  
887 platform for reference generation and analysis', *Nature protocols*, 8: 1494.
- 888 Härer, Andreas, Julián Torres-Dowdall, and Axel Meyer. 2017. 'Rapid adaptation to a novel  
889 light environment: the importance of ontogeny and phenotypic plasticity in shaping the  
890 visual system of Nicaraguan Midas cichlid fish (*Amphilophus citrinellus* spp.)',  
891 *Molecular ecology* 26: 5582-5593.
- 892 Helfman, Gene, Bruce B Collette, Douglas E Facey, and Brian W Bowen. 2009. *The diversity  
893 of fishes: biology, evolution, and ecology* (John Wiley & Sons).
- 894 Hofmann, Christopher M, and Karen L Carleton. 2009. 'Gene duplication and differential  
895 gene expression play an important role in the diversification of visual pigments in  
896 fish', *Integrative and comparative biology*, 49: 630-43.
- 897 Hofmann, Christopher M, Kelly E O'Quin, Adam R Smith, and Karen L Carleton. 2010.  
898 'Plasticity of opsin gene expression in cichlids from Lake Malawi', *Molecular  
899 ecology*, 19: 2064-74.
- 900 Hofmann, Christopher M., N. Justin Marshall, Kawther Abdilleh, Zil Patel, Ulrike E.  
901 Siebeck, and Karen L. Carleton. 2012. 'Opsin evolution in damselfish: convergence,  
902 reversal, and parallel evolution across tuning sites', *Journal of Molecular Evolution*,  
903 75: 79-91.

- 904 Holzer, Guillaume, Marc Besson, Anne Lambert, Loïc Francois, Paul Barth, Benjamin  
905 Gillet, Sandrine Hughes, Gwenaël Piganeau, Francois Leulier, Laurent Viriot, David  
906 Lecchini, and Vincent Laudet. 2017. 'Fish larval recruitment to reefs is a thyroid  
907 hormone-mediated metamorphosis sensitive to the pesticide chlorpyrifos', *eLife*, 6:  
908 e27595.
- 909 Hughes, Auatin. 1975. 'A quantitative analysis of the cat retinal ganglion cell topography',  
910 *Journal of Comparative Neurology*, 163: 107-28.
- 911 Hughes, Austin. 1977. 'The topography of vision in mammals of contrasting life style:  
912 comparative optics and retinal organisation.' in, *The visual system in vertebrates*  
913 (Springer).
- 914 Hunt, David M, Mark W Hankins, Shaun P Collin, and N Justin Marshall. 2014. *Evolution of*  
915 *visual and non-visual pigments* (Springer).
- 916 Innan, Hideki. 2009. 'Population genetic models of duplicated genes', *Genetica*, 137: 19.
- 917 Ito, Hironobu, and Takeshi Murakami. 1984. 'Retinal ganglion cells in two teleost species,  
918 *Sebastiscus marmoratus* and *Navodon modestus*', *Journal of Comparative Neurology*,  
919 229: 80-96.
- 920 Job, Suresh D., and David R. Bellwood. 2000. 'Light sensitivity in larval fishes: Implications  
921 for vertical zonation in the pelagic zone', *Limnology and Oceanography*, 45: 362-71.
- 922 Katoh, Kazutaka, and Daron M Standley. 2013. 'MAFFT multiple sequence alignment  
923 software version 7: improvements in performance and usability', *Molecular biology*  
924 *and evolution*, 30: 772-80.
- 925 L., Wong R. O., and Hughes A. 1987. 'Developing neuronal populations of the cat retinal  
926 ganglion cell layer', *Journal of Comparative Neurology*, 262: 473-95.
- 927 Lasiak, Theresa A. 1986. 'Juveniles, food and the surf zone habitat: implications for teleost  
928 nursery areas', *South African Journal of Zoology*, 21: 51-56.
- 929 Lecchini, David, Dufour V., Carleton J., Strand S., and R. Galzin. 2004. 'Estimating the patch  
930 size of larval fishes during colonization on coral reefs', *Journal of Fish Biology*, 65:  
931 1142-46.
- 932 Lecchini, David, Serge Planes, and René Galzin. 2005a. 'Experimental assessment of sensory  
933 modalities of coral-reef fish larvae in the recognition of their settlement habitat',  
934 *Behavioral Ecology and Sociobiology*, 58: 18-26.

- 935 Lecchini, David, Jeffrey Shima, Bernard Banaigs, and René Galzin. 2005b. 'Larval sensory  
936 abilities and mechanisms of habitat selection of a coral reef fish during settlement',  
937 *Oecologia*, 143: 326-34.
- 938 Leis, J. M., and B. M. Carson-Ewart. 1999. 'In situ swimming and settlement behaviour of  
939 larvae of an Indo-Pacific coral-reef fish, the coral trout *Plectropomus leopardus*  
940 (Pisces: Serranidae)', *Marine Biology*, 134: 51-64.
- 941 Lin, Jinn-Jy, Feng-Yu Wang, Wen-Hsiung Li, and Tzi-Yuan Wang. 2017. 'The rises and falls  
942 of opsin genes in 59 ray-finned fish genomes and their implications for environmental  
943 adaptation', *Scientific Reports*, 7: 15568.
- 944 Lisney, T. J., and S. P. Collin. 2008. 'Retinal Ganglion Cell Distribution and Spatial  
945 Resolving Power in Elasmobranchs', *Brain, Behavior and Evolution*, 72: 59-77.
- 946 Loew, ER, WN McFarland, EL Mills, and D %J Canadian Journal of Zoology Hunter. 1993.  
947 'A chromatic action spectrum for planktonic predation by juvenile yellow perch, *Perca*  
948 *flavescens*', 71: 384-86.
- 949 Losey, GS, WN McFarland, ER Loew, JP Zamzow, PA Nelson, and NJ Marshall. 2003.  
950 'Visual biology of Hawaiian coral reef fishes. I. Ocular transmission and visual  
951 pigments', *Copeia*, 2003: 433-54.
- 952 Luehrmann, Martin, Sara M Stieb, Karen L Carleton, Alisa Pietzker, Karen L Cheney, and N  
953 Justin MarshallJ Journal of Experimental Biology Marshall. 2018. 'Short-term colour  
954 vision plasticity on the reef: changes in opsin expression under varying light  
955 conditions differ between ecologically distinct fish species', 221: jeb175281.
- 956 Lythgoe, John Nicholas. 1979. *Ecology of vision* (Clarendon Press).
- 957 Marshall, NJ, K Jennings, WN McFarland, ER Loew, and GS Losey. 2003. 'Visual biology  
958 of Hawaiian coral reef fishes. III. Environmental light and an integrated approach to  
959 the ecology of reef fish vision', *Copeia*, 2003: 467-80.
- 960 Matthiessen, Ludwig. 1882. 'Ueber die Beziehungen, welche zwischen dem Brechungsindex  
961 des Kerncentrums der Krystalllinse und den Dimensionen des Auges bestehen',  
962 *Archiv für die gesamte Physiologie des Menschen und der Tiere*, 27: 510-23.
- 963 McComb, D. M., T. C. Tricas, and S. M. Kajiura. 2009. 'Enhanced visual fields in  
964 hammerhead sharks', *The Journal of Experimental Biology*, 212: 4010-18.
- 965 Miller, Mark A, Wayne Pfeiffer, and Terri Schwartz. 2010. "Creating the CIPRES Science  
966 Gateway for inference of large phylogenetic trees." In *Gateway Computing*  
967 *Environments Workshop (GCE), 2010*, 1-8. Ieee.

- 968 Mouritsen, Henrik, Jelle Atema, Michael J. Kingsford, and Gabriele Gerlach. 2013. 'Sun  
969 Compass Orientation Helps Coral Reef Fish Larvae Return to Their Natal Reef',  
970 *PLOS ONE*, 8: e66039.
- 971 Mundy, Bruce C. 2005. 'Checklist of the fishes of the Hawaiian Archipelago', *Bishop Mus.*  
972 *Bull. Zool.*, 6: 1-704.
- 973 Musilova, Zuzana, Fabio Cortesi, Michael Matschiner, Wayne IL Davies, Sara M Stieb,  
974 Fanny de Busserolles et al. 2019. 'Vision using multiple distinct rod opsins in deep-  
975 sea fishes', *Science*, 364 : 588-592.
- 976 Nandamuri, Sri Pratima, Miranda R Yourick, and Karen L Carleton. 2017. 'Adult plasticity in  
977 African Cichlids: rapid changes in opsin expression in response to environmental light  
978 differences', *Molecular ecology*, 26: 6036-52.
- 979 Novales-Flamarique, H, and C Hawryshyn. 1994. 'Ultraviolet photoreception contributes to  
980 prey search behaviour in two species of zooplanktivorous fishes', *Journal of*  
981 *Experimental Biology*, 186: 187-98.
- 982 Novales-Flamarique, Inigo. 2016. 'Diminished foraging performance of a mutant zebrafish  
983 with reduced population of ultraviolet cones', *Proceedings of the Royal Society B:*  
984 *Biological Sciences*, 283: 20160058.
- 985 O'Quin, Kelly E., Adam R. Smith, Anit Sharma, and Karen L. Carleton. 2011. 'New evidence  
986 for the role of heterochrony in the repeated evolution of cichlid opsin expression', 13:  
987 193-203.
- 988 Peichl, L., P. Nemeč, and H. Burda. 2004. 'Unusual cone and rod properties in subterranean  
989 African mole-rats (Rodentia, Bathyergidae)', *Eur J Neurosci*, 19: 1545-58.
- 990 Purcell, Steven W., and David R. Bellwood. 1993. 'A functional analysis of food  
991 procurement in two surgeonfish species, *Acanthurus nigrofuscus* and *Ctenochaetus*  
992 *striatus* (Acanthuridae)', *Environmental Biology of Fishes*, 37: 139-59.
- 993 Randall, John E, Gerald R Allen, and Roger C Steene. 1997. *Fishes of the great barrier reef*  
994 *and coral sea* (University of Hawaii Press).
- 995 Ronquist, Fredrik, Maxim Teslenko, Paul Van Der Mark, Daniel L Ayres, Aaron Darling,  
996 Sebastian Höhna, Bret Larget, Liang Liu, Marc A Suchard, and John P Huelsenbeck.  
997 2012. 'MrBayes 3.2: efficient Bayesian phylogenetic inference and model choice  
998 across a large model space', *Systematic biology*, 61: 539-42.
- 999 Sabbah, Shai, Raico Lamela Laria, Suzanne M. Gray, and Craig W. Hawryshyn. 2010.  
1000 'Functional diversity in the color vision of cichlid fishes', *BMC Biology*, 8: 133.
- 1001 Sale, Peter F. 2013. *The ecology of fishes on coral reefs* (Elsevier).

- 1002 Schindelin, J., I. Arganda-Carreras, E. Frise, V. Kaynig, M. Longair, T. Pietzsch, S.  
1003 Preibisch, C. Rueden, S. Saalfeld, B. Schmid, J. Y. Tinevez, D. J. White, V.  
1004 Hartenstein, K. Eliceiri, P. Tomancak, and A. Cardona. 2012. 'Fiji: an open-source  
1005 platform for biological-image analysis', *Nat Methods*, 9: 676-82.
- 1006 Shand, Julia. 1997. 'Ontogenetic changes in retinal structure and visual acuity: a comparative  
1007 study of coral-reef teleosts with differing post-settlement lifestyles', *Environmental*  
1008 *Biology of Fishes*, 49: 307-22.
- 1009 Shand, Julia, Michael A Archer, and Shaun P Collin. 1999. 'Ontogenetic changes in the  
1010 retinal photoreceptor mosaic in a fish, the black bream, *Acanthopagrus butcheri*',  
1011 *Journal of Comparative Neurology*, 412: 203-17.
- 1012 Shand, Julia, Stephanie M Chin, Alison M Harman, Stephen Moore, and Shaun P Collin.  
1013 2000. 'Variability in the location of the retinal ganglion cell area centralis is correlated  
1014 with ontogenetic changes in feeding behavior in the black bream, *Acanthopagrus*  
1015 *butcheri* (Sparidae, Teleostei)', *Brain, Behavior and Evolution*, 55: 176-90.
- 1016 Shand, Julia, Wayne L Davies, Nicole Thomas, Lois Balmer, Jill A Cowing, Marie Pointer,  
1017 Livia S Carvalho, Ann EO Trezise, Shaun P Collin, and Lyn D Beazley. 2008. 'The  
1018 influence of ontogeny and light environment on the expression of visual pigment  
1019 opsins in the retina of the black bream, *Acanthopagrus butcheri*', *Journal of*  
1020 *Experimental Biology*, 211: 1495-503.
- 1021 Siebeck, U. E., and N. J. Marshall. 2007. 'Potential ultraviolet vision in pre-settlement larvae  
1022 and settled reef fish—A comparison across 23 families', *Vision Research*, 47: 2337-  
1023 52.
- 1024 Siebeck, Ulrike E., and N. Justin Marshall. 2001. 'Ocular media transmission of coral reef  
1025 fish — can coral reef fish see ultraviolet light?', *Vision Research*, 41: 133-49.
- 1026 Slomianka, L, and Mark J West. 2005. 'Estimators of the precision of stereological estimates:  
1027 an example based on the CA1 pyramidal cell layer of rats', *Neuroscience*, 136: 757-  
1028 67.
- 1029 Smith, Raymond C., and Karen S. Baker. 1981. 'Optical properties of the clearest natural  
1030 waters (200–800 nm)', *Applied Optics*, 20: 177-84.
- 1031 Sorenson, L., Francesco Santini, Giorgio Carnevale, and Michael E. Alfaro. 2013. 'A multi-  
1032 locus timetree of surgeonfishes (Acanthuridae, Percomorpha), with revised family  
1033 taxonomy', *Molecular phylogenetics and evolution*, 68: 150-60.
- 1034 Spady, Tyrone C., Juliet W. L. Parry, Phyllis R. Robinson, David M. Hunt, James K.  
1035 Bowmaker, and Karen L. Carleton. 2006. 'Evolution of the cichlid visual palette

- 1036 through ontogenetic subfunctionalization of the opsin gene arrays', *Molecular biology*  
1037 *and evolution*, 23: 1538-47.
- 1038 Stieb, Sara M, Karen L Carleton, Fabio Cortesi, N Justin Marshall, and Walter Salzburger.  
1039 2016. 'Depth-dependent plasticity in opsin gene expression varies between damselfish  
1040 (Pomacentridae) species', *Molecular ecology*, 25: 3645-61.
- 1041 Stieb, Sara M., Fabio Cortesi, Lorenz Sueess, Karen L. Carleton, Walter Salzburger, and N. J.  
1042 Marshall. 2017. 'Why UV vision and red vision are important for damselfish  
1043 (Pomacentridae): structural and expression variation in opsin genes', *Molecular*  
1044 *ecology*, 26: 1323-42.
- 1045 Stieb, Sara M., Fanny de Busserolles, Karen L. Carleton, Fabio Cortesi, Wen-Sung Chung,  
1046 Brian Dalton, Luke A. Hammond, and Justin Marshall. 2019. 'Seeing through the eyes  
1047 of the anemonefish, *Amphiprion akindynos*: a detailed investigation of its visual system  
1048 and visual ecology', *in review*.
- 1049 Stone, Jonathan, and Elizabeth Johnston. 1981. 'The topography of primate retina: a study of  
1050 the human, bushbaby, and new-and old-world monkeys', *Journal of Comparative*  
1051 *Neurology*, 196: 205-23.
- 1052 Suresh, D. Job, and Shand Julia. 2001. 'Spectral sensitivity of larval and juvenile coral reef  
1053 fishes: implications for feeding in a variable light environment', *Marine Ecology*  
1054 *Progress Series*, 214: 267-77.
- 1055 Torres-Dowdall, J., Michele E. R. Pierotti, Andreas Härer, Nidal Karagic, Joost M.  
1056 Woltering, Frederico Henning, Kathryn R. Elmer, and Axel Meyer. 2017. 'Rapid and  
1057 parallel adaptive evolution of the visual system of Neotropical Midas cichlid fishes',  
1058 *Molecular Biology and Evolution*, 34: 2469-2485.
- 1059 Ullmann, J. F., B. A. Moore, S. E. Temple, E. Fernandez-Juricic, and S. P. Collin. 2012. 'The  
1060 retinal wholemount technique: a window to understanding the brain and behaviour',  
1061 *Brain Behav Evol*, 79: 26-44.
- 1062 Walls, G. L. 1934. 'The Reptilian Retina: I. A new concept of visual-cell evolution',  
1063 *American Journal of Ophthalmology*, 17: 892-915.
- 1064 Walls, Gordon Lynn. 1942. 'The vertebrate eye and its adaptive radiation'.
- 1065 West, M. J., L. H. J. G. Slomianka, and H. J. G. Gundersen. 1991. 'Unbiased stereological  
1066 estimation of the total number of neurons in the subdivisions of the rat hippocampus  
1067 using the optical fractionator', *The Anatomical Record*, 231: 482-97.
- 1068



1069 **Tables**

1070 **Table 1** Summary of ganglion cell quantitative data obtained using the optical fractionator  
 1071 method on the wholemounted retinas of three developmental stages of *N. brevirostris*.

| Stage    | Individual | Peak cell density,<br>(cells/mm <sup>2</sup> ) | Mean cell density<br>(cells/mm <sup>2</sup> ) | Total cells | Lens Ø<br>(mm) | SRP  |
|----------|------------|------------------------------------------------|-----------------------------------------------|-------------|----------------|------|
| Adult    | ID1        | 20,617                                         | 5,340                                         | 2,034,000   | 6.6            | 10.6 |
|          | ID2        | 20,370                                         | 4,772                                         | 2,100,825   | 6.9            | 11.0 |
| Juvenile | ID1        | 23,750                                         | 8,130                                         | 1,617,968   | 4.7            | 8.1  |
|          | ID2        | 24,531                                         | 8,688                                         | 1,737,656   | 4.9            | 8.6  |
|          | ID3        | 21,875                                         | 8,584                                         | 1,450,625   | 4.5            | 7.5  |
| Larvae   | ID1        | 30,400                                         | 19,439                                        | 208,975     | 1.4            | 2.98 |

SRP = spatial resolving power, Ø = diameter

1072

1073

1074 **Table 2** Summary of photoreceptor quantitative data obtained using the optical fractionator  
 1075 method on the wholemounted retinas of three developmental stages of *N. brevirostris*.

| Stage    | Individual | Total DC  | Peak DC<br>(cells/mm <sup>2</sup> ) | Total SC  | Peak SC<br>(cells /mm <sup>2</sup> ) | Total cones | Peak TC<br>(cells mm <sup>2</sup> ) |
|----------|------------|-----------|-------------------------------------|-----------|--------------------------------------|-------------|-------------------------------------|
| Adult    | ID3        | 3,738,296 | 23,703                              | 1,926,513 | 12,098                               | 5,664,809   | 35,801                              |
|          | ID4        | 3,820,839 | 21,208                              | 1,972,975 | 12,345                               | 5,793,814   | 33,553                              |
| Juvenile | ID3        | 2,466,222 | 34,218                              | 1,283,524 | 18,125                               | 3,749,746   | 52,343                              |
|          | ID4        | 3,212,099 | 32,968                              | 1,667,475 | 17,187                               | 4,879,574   | 50,155                              |
| Larvae   | ID2        | 452,010   | 45,432                              | 231,371   | 23,703                               | 683,381     | 69,135                              |
|          | ID3        | 413,476   | 45,432                              | 211,105   | 23,704                               | 624,581     | 69,136                              |

DC = double cones; SC = single cones

1076

1077

1078 **Figures**

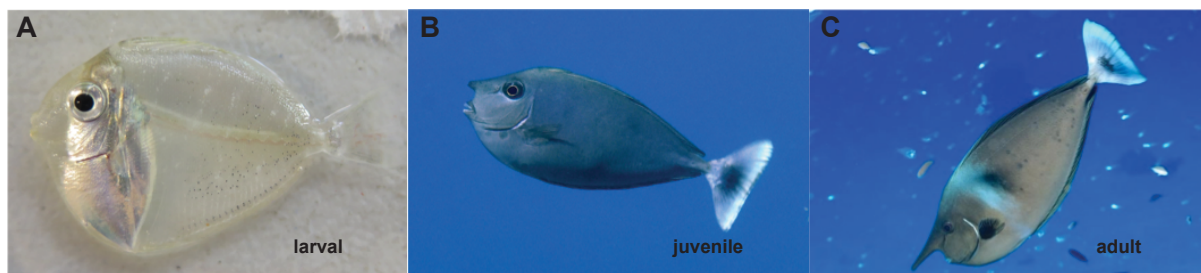

1079

1080 **Fig. 1 *Naso brevirostris* developmental stages.** The spotted unicornfish, *N. brevirostris*,  
1081 shows pronounced ontogenetic changes in habitat, diet and morphology. (A) A ‘transparent’  
1082 zooplanktivorous larva at the settlement stage (i.e., when returning from the pelagic to the  
1083 reef). (B) An algivorous juvenile that lives in close proximity to the reef. (C) A  
1084 zooplanktivorous adult that lives in the water column above the reef. Note the growth of the  
1085 prominent snout throughout development.

1086

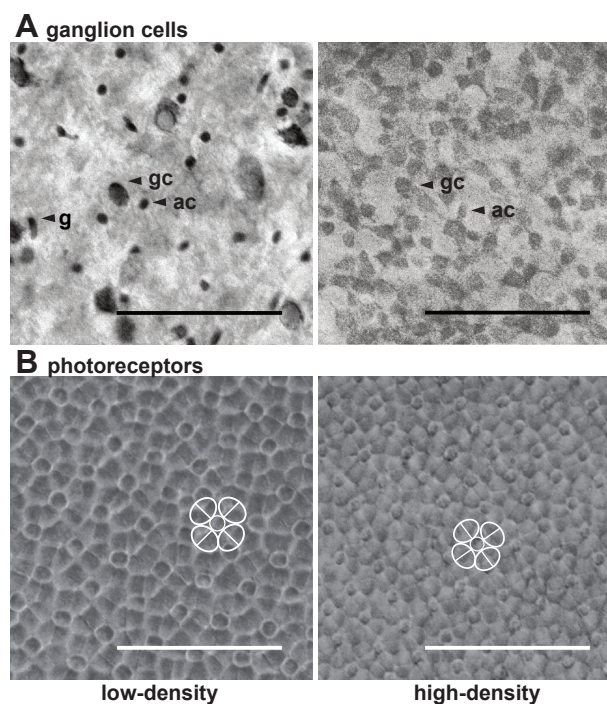

1087

1088 **Fig. 2 Light micrographs of various retinal layers as found in an adult *N. brevirostris*.**  
1089 (A) Micrographs of the Nissl-stained ganglion cell layer taken in a low-density (nasal part)  
1090 and a peak-density area (central part) of the retina. Ganglion cells (gc) could clearly be  
1091 distinguished from glial cells (g) by their round shape and difference in size. Distinguishing  
1092 amacrine cells (ac) from gc, however, was more difficult. (B) Micrographs of the  
1093 photoreceptor layer taken in a low-density (nasal part) and a peak-density area (temporal  
1094 part). Photoreceptors formed a square mosaic with a central single cone (sc) surrounded by  
1095 four double cones (dc). Scale bar = 50  $\mu$ m.

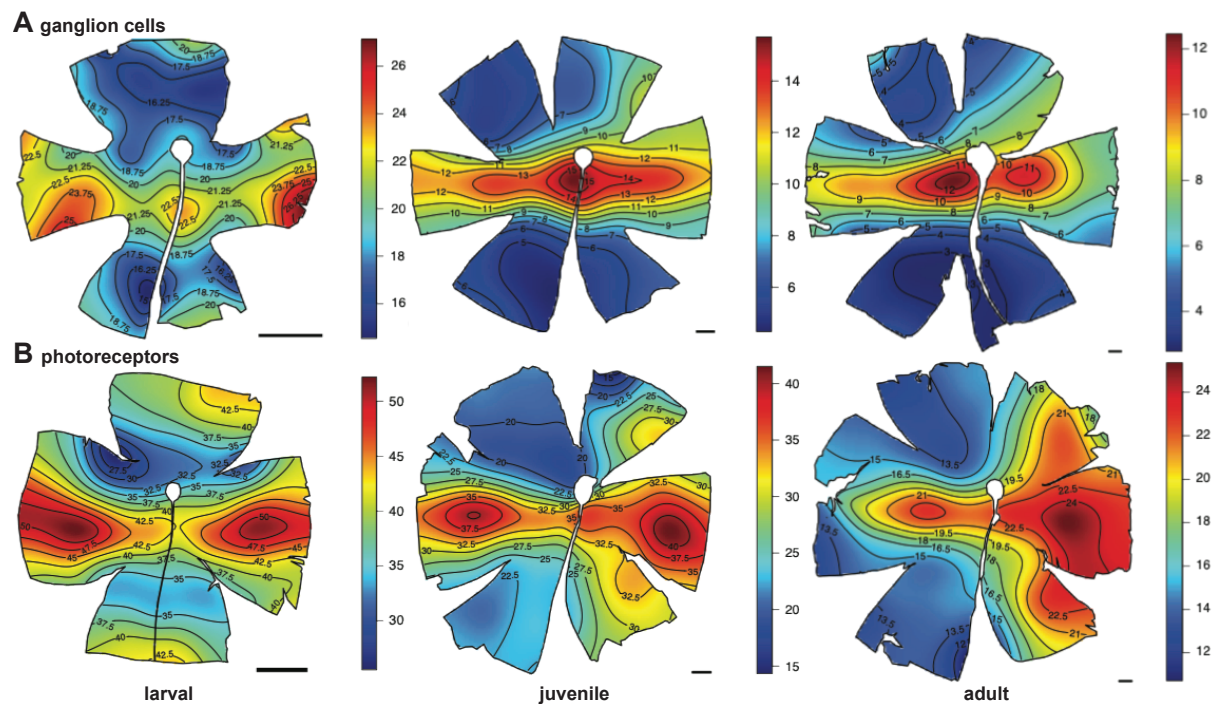

1096

1097 **Fig. 3 Topographic heat maps of ganglion and photoreceptor-cell distribution. (A)**

1098 Topographic distribution of retinal ganglion cells revealed a pronounced horizontal streak  
1099 with a central area of high cell-density in adult and juvenile individuals. The same features,  
1100 albeit less pronounced, were also present in larvae (see Fig. S1 for maps of additional  
1101 individuals). (B) Topographic distribution of total photoreceptors (double and single cones)  
1102 revealed an increase in specialization from two area centralis in larvae to the formation of a  
1103 horizontal streak and a weak dorsal vertical streak in juveniles. A more pronounced dorsal  
1104 vertical streak was found in adults (see Figs. S2-S4 for single and double cone maps as well  
1105 as maps of additional individuals). Black lines represent isodensity contours, and values are  
1106 expressed in densities  $\times 10^3$  cells/mm<sup>2</sup>. V = Ventral, T = temporal. Scale bar = 1 mm.

1107

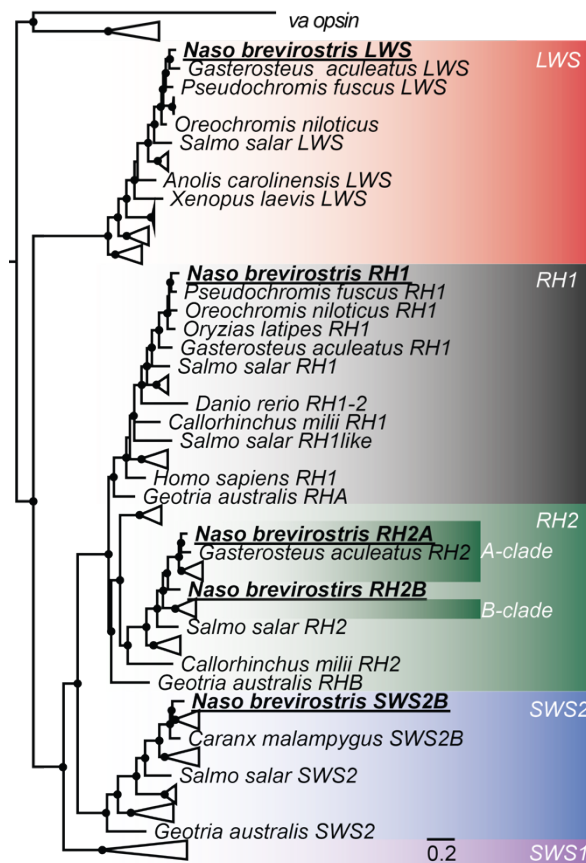

1108

1109 **Fig. 4 Vertebrate visual opsin gene phylogeny.** The different *N. brevirostris* opsin genes  
 1110 which were mined from the retinal transcriptomes are highlighted in bold and belong to four  
 1111 of the five major visual opsin classes. Black spheres indicate Bayesian posterior probabilities  
 1112 > 0.8. Note that the *N. brevirostris* *RH2B* gene is placed in-between the percomorph *RH2A*  
 1113 and *RH2B* clades (also see Fig. 5). *RH1* = rhodopsin 1 (rod opsin), *RH2* = rhodopsin 2, *SWS2*  
 1114 = short-wavelength-sensitive 2, *LWS* = long-wavelength-sensitive, *va* = vertebrate ancient  
 1115 opsin (outgroup), scalebar = substitution per site. A detailed phylogeny and GenBank  
 1116 accession numbers are shown in Fig. S6.

1117

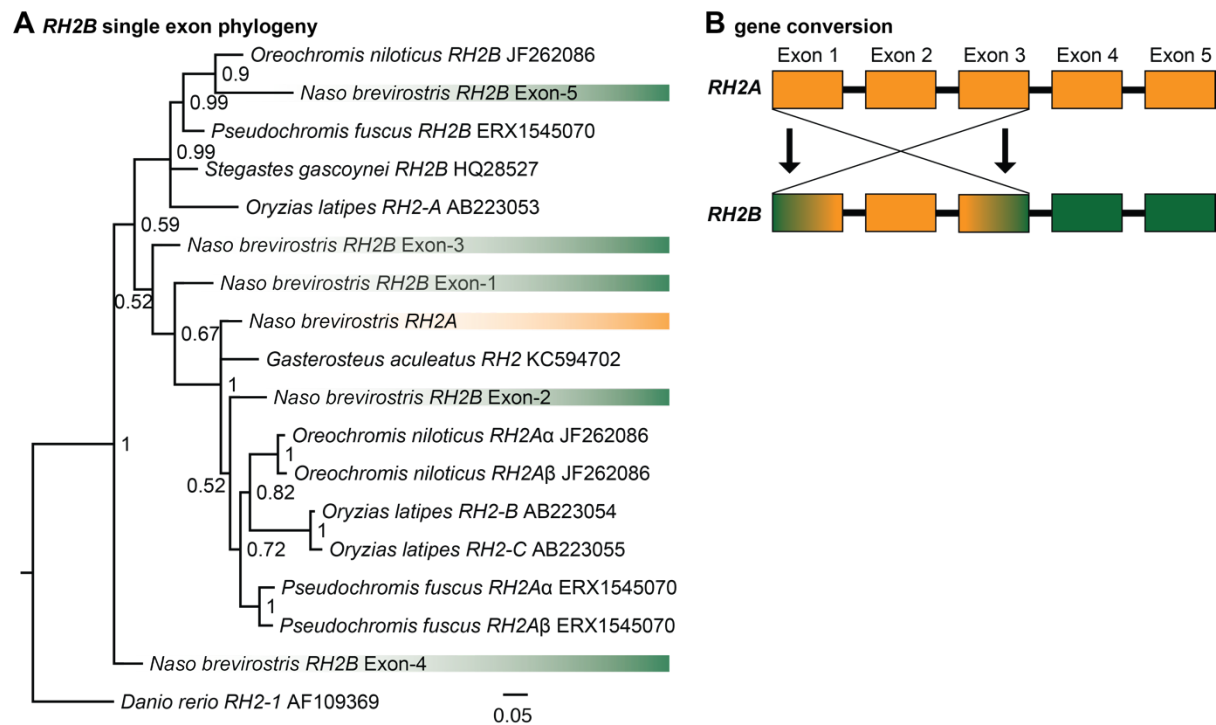

1118

1119 **Fig. 5 Single-exon green opsin (RH2) phylogeny.** (A) Using the single exons (green) of the  
 1120 *N. brevirostris* RH2B gene revealed that exons 3-5 cluster within or close to the percomorph  
 1121 RH2B clade, whereas exons 1 and 2 cluster close to or within the RH2A clade (*N. brevirostris*  
 1122 RH2A in yellow). Note that *Oryzias latipes* genes have a different nomenclature in  
 1123 comparison to the other fish opsin genes. Nodes denote Bayesian posterior probabilities. (B)  
 1124 Illustration of the relationship between the two RH2 paralogs of *N. brevirostris* based on the  
 1125 single-exon RH2B phylogeny. The suggested gene conversion from RH2A into Exons 1-3 of  
 1126 RH2B makes it near impossible to resolve its phylogenetic position if considering the whole  
 1127 coding region of the gene (also see Fig. 3).

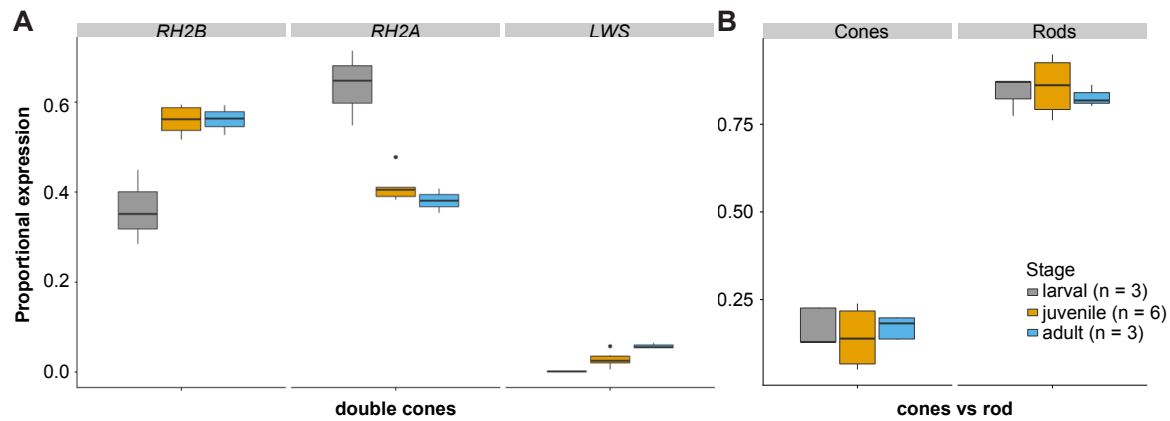

1128

1129

1130

1131

1132

1133

1134

1135

1136

1137

1138

**Fig. 6 Proportional expression of *N. brevisrostris* opsin genes.** (A) Independent of ontogenetic stage, *N. brevisrostris* expressed the *SWS2B* single cone (100% of single cone expression; see Table S3 for details) and three double cone opsin genes: *RH2B*, *RH2A*, and *LWS*. The proportional expression of double cone opsins revealed a change in expression of the two *RH2* genes between the larval and the juvenile stage as well as a steady increase in the expression of *LWS* with development. (B) The proportional expression of cone (*SWS2B*, *RH2B*, *RH2A*, *LWS*) versus rod opsin (*RH1*) remained similar throughout ontogeny. The box indicates Q2 and Q3, with the line indicating the median and the whiskers indicating Q1 and Q4 of the data.
